# Supplementary material
Source: PubMed Central journal article supplement (PMC2072999)
Supplement: NIHMS25554-supplement-01.pdf [file NIHMS25554-supplement-01.pdf]

# **MicroRNA-mediated Feedback and Feedforward Loops are Recurrent Network Motifs in Mammals**

Supplementary Data

John Tsang, Jun Zhu, Alexander van Oudenaarden

**Table S1a** Negative auto-regulatory loops that are conserved across human/mouse/rat/dog.

| Host gene | miRNA    | Gene description                                                                                                                                                               |
|-----------|----------|--------------------------------------------------------------------------------------------------------------------------------------------------------------------------------|
| NM_005730 | miR-26a  | CTD (carboxy-terminal domain, RNA polymerase II, polypeptide A)<br>small phosphatase 2/nuclear LIM interactor-interacting factor<br>2/conserved gene amplified in osteosarcoma |
| NM_016300 | miR-128b | cyclic AMP-regulated phosphoprotein                                                                                                                                            |
| NM_004319 | miR-488  | astrotactin;cell/neuron adhesion                                                                                                                                               |

**Table S1b** Additional negative auto-regulatory loops based on non-conserved seed-matches.

| Host gene    | miRNA   | Gene description                                                    |
|--------------|---------|---------------------------------------------------------------------|
| NM_005455    | miR-186 | zinc finger protein 265/RNA splicing                                |
| NM_002081    | miR-149 | Glypican 1                                                          |
| NM_007085    | miR-198 | follistatin-like 1/autoantigen associated with rheumatoid arthritis |
| NM_016215    | miR-126 | EGF-like-domain, multiple 7/angiogenesis/blood vessel development   |
| NM_001007471 | miR-204 | Transient receptor potential cation channel, subfamily M, member 3  |
| NM_021990    | miR-224 | gamma-aminobutyric acid (GABA) A receptor, epsilon                  |
| NM_000390    | miR-361 | choroideremia (Rab escort protein 1)                                |
| NM_017551    | miR-346 | glutamate receptor, ionotropic, delta 1                             |
| NM_002438    | miR-511 | Mannose receptor, C type 1                                          |

**Table S1c** Additional negative auto-regulatory loops based on Miranda (Enright et al., 2003) with  $\Delta G < -20$  kcal/mol

| Host gene    | miRNA    | Gene description                                                                                                                       |
|--------------|----------|----------------------------------------------------------------------------------------------------------------------------------------|
| NM_031407    | let-7f   | HECT, UBA and WWE domain containing 1                                                                                                  |
| NM_007014    | miR-140  | WW domain containing E3 ubiquitin protein ligase 2                                                                                     |
| NM_005578    | miR-28   | LIM domain containing preferred translocation partner in lipoma<br>arrestin, beta 1/dampening of cellular responses to stimuli such as |
| NM_004041    | miR-326  | hormones, neurotransmitters, or sensory signals                                                                                        |
| NM_032350    | miR-339  | hypothetical protein MGC11257                                                                                                          |
| NM_001033563 | miR-423  | coiled-coil domain containing 55                                                                                                       |
| NM_000868    | miR-448  | 5-hydroxytryptamine (serotonin) receptor 2C                                                                                            |
| NM_021990    | miR-452  | gamma-aminobutyric acid (GABA) A receptor, epsilon                                                                                     |
| NM_021990    | miR-452* | gamma-aminobutyric acid (GABA) A receptor, epsilon                                                                                     |

Details of putative target sites predicted by Miranda can be found in the linked page [miranda-report.html](#) on the Supplementary Information website (note that the miRNAs listed are always embedded in the corresponding target gene.).

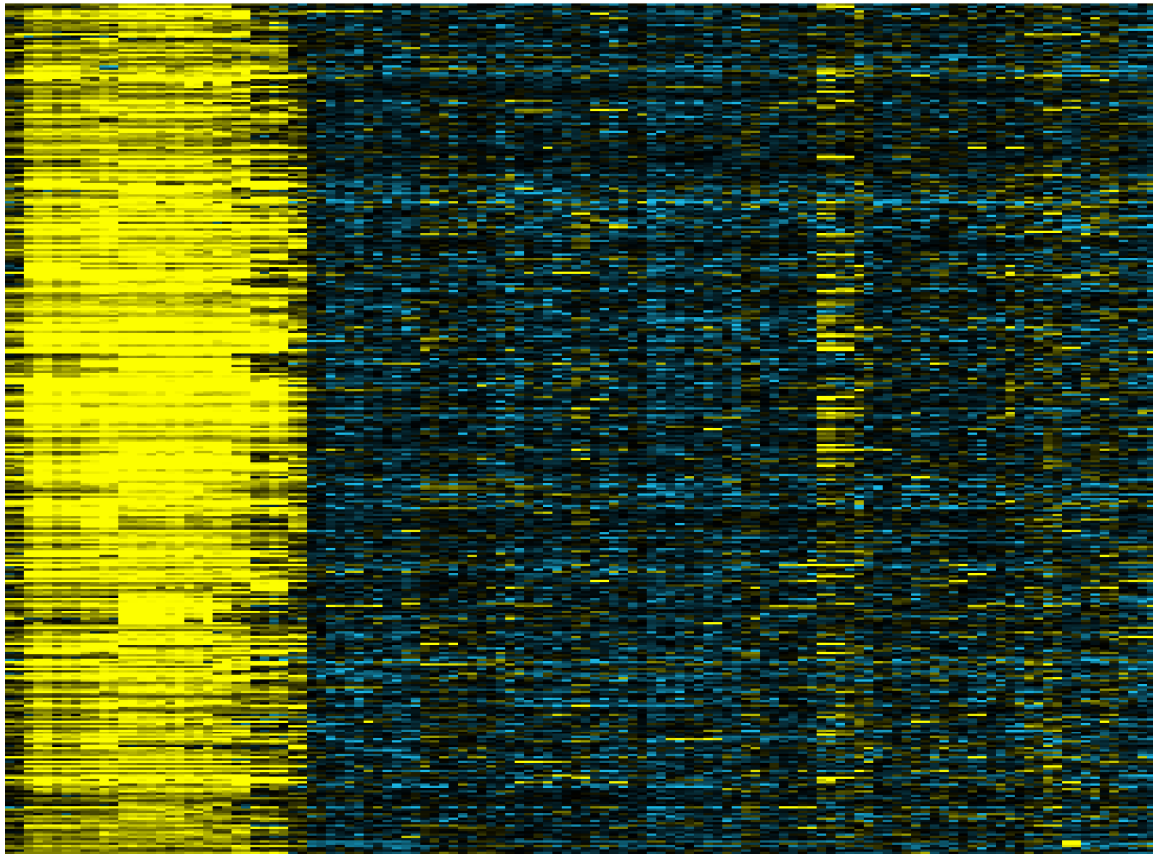

neuronal tissues

**Figure S1** Neuronal-enriched gene cluster (1012 genes) used to identify neuronal-enriched miRNAs using CE analysis.

## Host-gene Probe Selection

We used embedded miRNAs that reside in introns and are on the same strand as their host genes. This gave us an initial set of embedded miRNAs along with their host-gene probes. Three different microarray designs were used to generate the four data sets we used: GNF1H/U133A for human, GNF1M for mouse, and Affy-430 for MDEV and NCELL. Since the coverage for RefSeq genes is not uniform among these arrays, a slightly different set of miRNAs was analyzed in each data set.

We removed probes from the initial set of embedded miRNAs based on 1) wrong or inconsistent probes (see below); and 2) probes for miRNAs whose seeds occur at very low frequencies that prevent meaningful statistical analysis. According to the supplied annotations, some host genes are represented by more than one probe on the microarray. In several instances, we found that these annotations are wrong. For instance, some probes were mapped to the opposite strand of a gene, while others cover truncated variants(s) of the gene that typically do not include the intron where the miRNA is embedded. Therefore we first manually examined all probe annotations and removed badly-annotated probes by using the probe alignments in the UCSC Genome Database ([genome.ucsc.edu](http://genome.ucsc.edu)). In addition, different probes could measure the expression of different isoforms resulted from alternative splicing or alternative promoter usage. For host genes with multiple probes in the human and mouse expression atlases, the expression patterns of different probes generally agree with each other (median correlation coefficient  $> 0.5$ ). A small number of host genes have probes with inconsistent expression patterns; this is likely because different probes measured the expression of different transcript isoforms. Embedded miRNAs could be co-transcribed with different mRNA isoforms, because the intron that contains the miRNA could be included in the pre-mRNA transcript of different mRNA isoforms. Therefore we report CE analysis results for all valid probes because we would like to utilize all potentially meaningful expression patterns of the embedded miRNA(s). The probes removed prior to human and mouse CE analyses are listed in Table S2a-b.

For the MDEV and NCELL data sets, a substantially higher number of host genes have multiple probes, sometimes with different expression patterns. The pairwise correlation between probes that mapped to the same gene ranges from -0.7 to 0.96 (median for MDEV (NCELL) is 0.6 (0.12)). This phenomenon is likely due to the high frequency of alternative splicing in the brain; some probes could also be dysfunctional. To avoid reporting erroneous results due to bad probes, we conservatively removed

probes that are likely erroneous by using the following method. For host genes with two probes, we removed the gene if the correlation between the two probes is less than a predefined threshold. For host genes with more than two probes, we tried to detect outliers by first finding the largest group of probes that are consistent with each other in a pairwise manner. Next we removed those probes whose correlation with any probe in the core group is below the threshold. If a unique core group of size at least two can not be found (e.g. if there are two groups that can not be merged due to low correlation between at least one pair of members from each group), the gene is removed from our analysis. We used a relatively low threshold of 0.3 to avoid removing probes that report expression of isoforms. This procedure should eliminate most extreme outliers but retain probes that might correspond to isoforms. Since the MDEV data set tend to have a higher median correlation between probes (0.6), we also tried using higher thresholds (0.6-0.7), but the percentage of miRNAs that exhibit Type I/II bias remained essentially identical to that when a threshold of 0.3 was used. All probes removed prior to MDEV and NCELL CE analyses are listed in Table S2c-d.

## Comparison of CE Analysis Results among Data Sets

As discussed in the main text, since different data sets tend to cover different conditions, it is not meaningful to compare CE results across data sets (the human and mouse data sets are somewhat comparable, see below). For instance, the transcription of a miRNA can be regulated by different *cis* regulatory modules under different conditions, or it may not be regulated at all (i.e. constitutively expressed or absent). Two example CE profiles across all four data sets can be found in Figures S2 and S3.

Since a relatively large number of the conditions profiled in the human and mouse data sets are homologous, we tried to compare the type of bias shown by orthologous embedded miRNAs in human and mouse. We defined an embedded miRNA in human to be the ortholog of a mouse embedded miRNA of the same sequence if their host genes are orthologs of each other. Aside from a few exceptions, orthologous miRNAs biased for Type I networks are consistent in the two organisms (12/14). However, a larger number of Type-II-biased miRNAs exhibit bias in only one of human or mouse (with 5/16 being consistent). Closer examination upon the expression pattern of host orthologs indicates that some host-gene's expression pattern have diverged significantly. For instance, miR-103 is significantly upregulated in selected brain tissues in human but not in mouse (Figure S4); miR-326 is ubiquitously upregulated in mouse brain tissues but not in immune cells; but in human it is upregulated in a large number of immune cells and only in a small number of brain tissues (Figure S5). As expected, some of the discrepancies can be attributed to the differences in the conditions profiled. The mouse data set has far less coverage of immune/cancer cell types compared to human, but has extensive coverage of embryonic developmental time-points and tissues (e.g. oocytes and blastocysts), whereas the human data set has none. Hence, miRNAs whose expression signature is characterized by up- or down-regulation in these conditions are likely to only exhibit bias in only one of human or mouse (Figure S6; e.g. miR-93 biased for Type II in mouse only (Table S4 and S3)). The higher level of consistency of Type-I-biased miRNAs is partially due to the fact that a large fraction of them are neuronal-enriched and both data sets have extensive coverage of brain tissues.

**Table S2a** Human host-gene probes removed prior to CE analysis

| <b>miRNA</b>   | <b>Host-gene Probe</b> | <b>Reason for removal</b>                                                                                                                                                                                                                                                                                                                  |
|----------------|------------------------|--------------------------------------------------------------------------------------------------------------------------------------------------------------------------------------------------------------------------------------------------------------------------------------------------------------------------------------------|
| 128a (chr2)    | 581                    | Probe covers a very short version of the host gene (1)                                                                                                                                                                                                                                                                                     |
| 211 (chr5)     | 8752                   | Probe covers the opposite strand (2)                                                                                                                                                                                                                                                                                                       |
| 26a (chr3)     | 442                    | 2                                                                                                                                                                                                                                                                                                                                          |
| 149 (chr2)     | 8488                   | Probe covers the next gene, so cross-hyb would be possible (3)                                                                                                                                                                                                                                                                             |
| 15a/16 (chr13) | 1686                   | 2                                                                                                                                                                                                                                                                                                                                          |
| 15b/16 (chr3)  | 408                    | 1                                                                                                                                                                                                                                                                                                                                          |
| 218 (chr5)     | 10988                  | The expression pattern of this probe is not consistent with the other two probes (7811 and 7898). It turns out that the expression pattern of this probe resembles that of another copy of miR-218 (chr4, probe 2221), which is embedded in a duplicated copy of the host gene of miR-218-chr5. This is likely due to cross-hybridization. |
| 330 (chr19)    | 12215                  | 2                                                                                                                                                                                                                                                                                                                                          |
| 9 (chr1)       | 16739                  | 1                                                                                                                                                                                                                                                                                                                                          |
| 9* (chr1)      | 16739                  | 1                                                                                                                                                                                                                                                                                                                                          |
| 140 (chr16)    | 932                    | 1                                                                                                                                                                                                                                                                                                                                          |
| 204 (chr9)     | 14286                  | 1                                                                                                                                                                                                                                                                                                                                          |
| 26a (chr12)    | 824                    | 1                                                                                                                                                                                                                                                                                                                                          |
| 489 (chr7)     | 4479                   | 1                                                                                                                                                                                                                                                                                                                                          |
| 126 (chr9)     | 3324 (all probes)      | Seed-match occurrence frequency is too low for meaningful analysis                                                                                                                                                                                                                                                                         |

**Table S2b** Mouse host-gene probes removed prior to CE analysis

| <b>miRNA</b> | <b>Host-gene Probe</b> | <b>Reason for removal</b>                                          |
|--------------|------------------------|--------------------------------------------------------------------|
| 340 (chr11)  | 2522                   | Seed-match occurrence frequency is too low for meaningful analysis |

**Table S2c** Probes removed prior to MDEV CE analysis

| <b>miRNA</b> | <b>Host-gene Probe</b>              | <b>Reason for removal</b>                                           |
|--------------|-------------------------------------|---------------------------------------------------------------------|
| Let-7f       | 34,8694,14599 (all probes)          | Probes inconsistent (1)                                             |
| 126-3p       | 5240,13231,17737,17738 (all probes) | Seed-match occurrence frequency is too low for meaningful analysis. |
| 128b         | 8048                                | Probe covers a very short version of the host gene.                 |
| 140          | 19938                               | 1                                                                   |
| 151          | 6906,11962 (all probes)             | 1                                                                   |
| 208          | 15058,15327                         | 1                                                                   |
| 28           | 9344,13455,13587,19323 (all probes) | 1                                                                   |
| 301          | 7279,13782 (all probes)             | 1                                                                   |
| 98           | 34,8694,14599 (all probes)          | 1                                                                   |

**Table S2d** Probes removed prior to NCELL CE analysis

| <b>miRNA</b> | <b>Host-gene Probe</b>              | <b>Reason for removal</b>                                           |
|--------------|-------------------------------------|---------------------------------------------------------------------|
| Let-7f       | 34,8694,14599 (all probes)          | Probes inconsistent (1)                                             |
| 106b         | 351                                 | 1                                                                   |
| 126-3p       | 5240,13231,17737,17738 (all probes) | Seed-match occurrence frequency is too low for meaningful analysis. |
| 126-5p       | 5240,13231,17737,17738 (all probes) | 1                                                                   |
| 128b         | 8048                                | Probe covers a very short version of the host gene.                 |
| 140          | 14658                               | 1                                                                   |
| 151          | 6906,11962 (all probes)             | 1                                                                   |
| 15b/16       | 10749,10750,18431 (all probes)      | 1                                                                   |
| 207          | 607,20038 (all probes)              | 1                                                                   |
| 208          | 2033, 15326,15327                   | 1                                                                   |
| 25           | 351                                 | 1                                                                   |
| 28           | 9344,13455,13587,19323 (all probes) | 1                                                                   |
| 483          | 251,14664 (all probes)              | 1                                                                   |
| 93           | 351                                 | 1                                                                   |
| 301          | 7279,13782 (all probes)             | 1                                                                   |
| 98           | 34,8694,14599 (all probes)          | 1                                                                   |



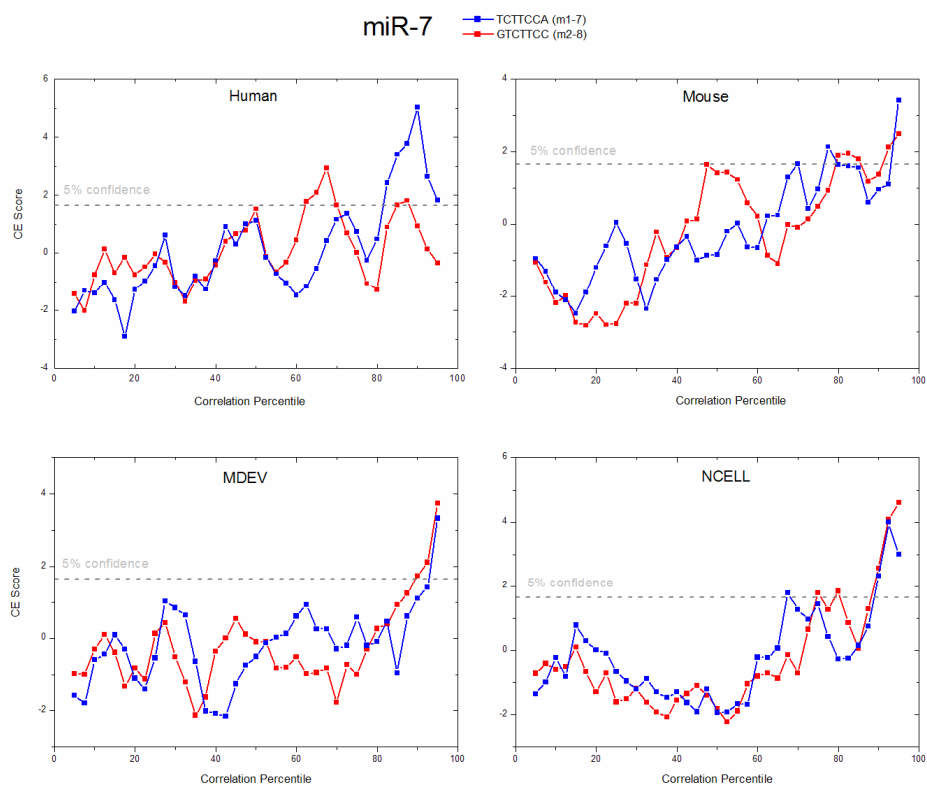

**Figure S2.** CE profiles of *miR-7* in all four data sets. Note that consistent Type I signatures are present across all data sets.

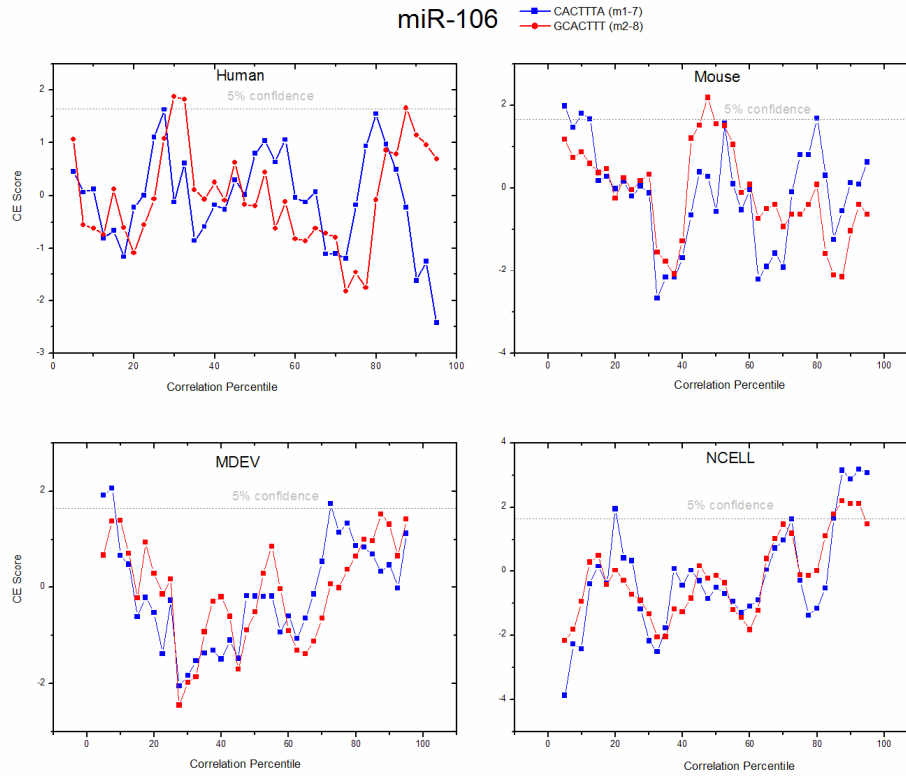

**Figure S3.** CE profiles of *miR-106* in all four data sets. Note that *miR-106* only displays Type I bias in the NCELL data set, even though the trend in the MDEV data set also indicates that Type I bias is likely. In addition, *miR-106* shows Type II bias in the mouse and MDEV data sets only.

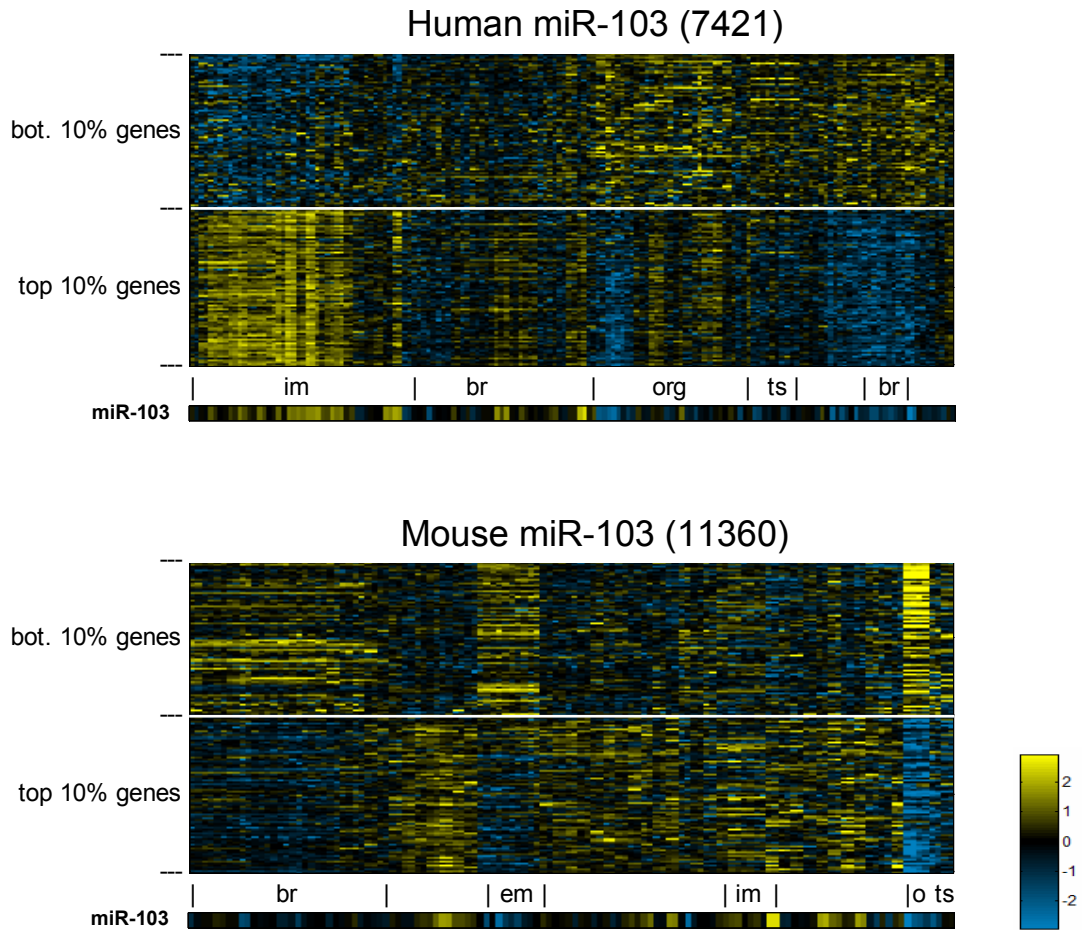

**Figure S4.** Expression pattern of genes that are highly positively or negatively correlated with *miR-103* in the human and mouse expression atlases. Conditions: **im**=immune/cancer; **br**=brain; **org**=organs; **ts**=testis-related; **o**=oocyte; **em**=embryonic.

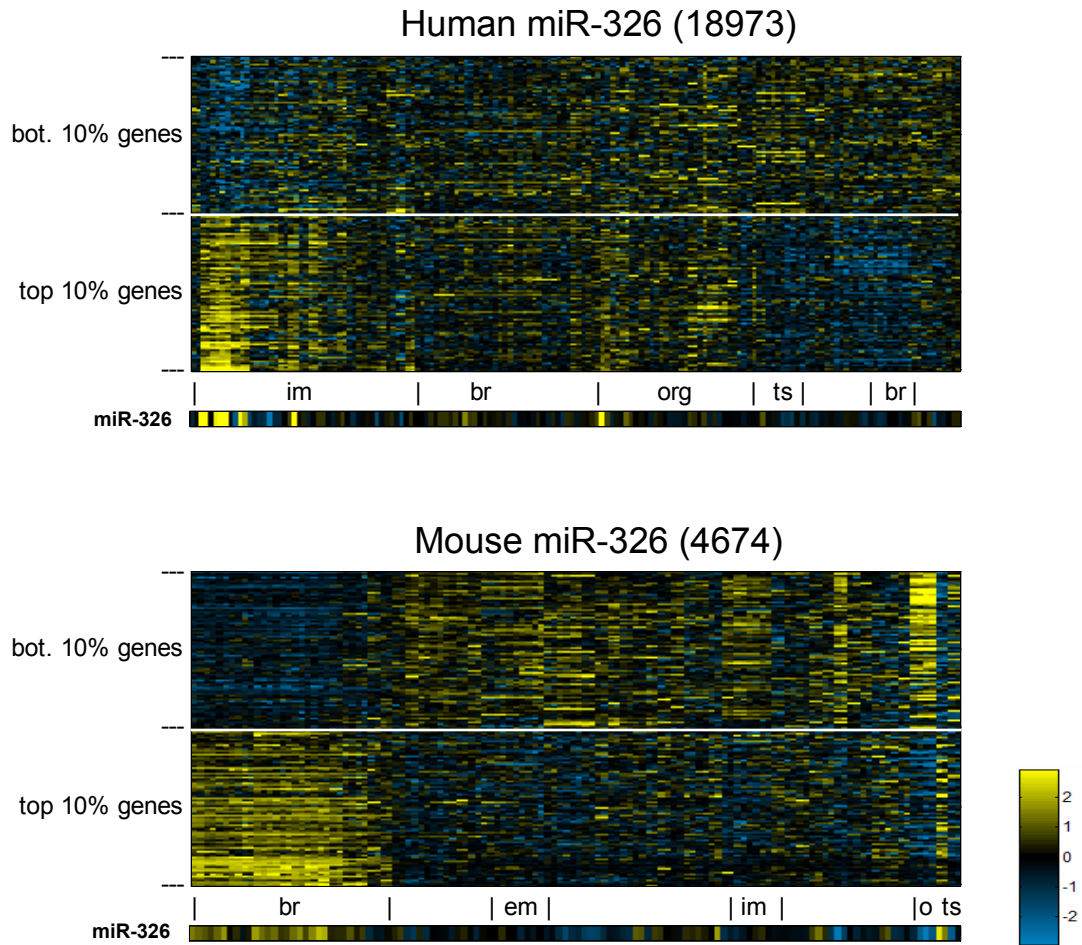

**Figure S5.** Expression pattern of genes that are highly positively or negatively correlated with *miR-326* in the human and mouse expression atlases. Conditions: **im**=immune/cancer; **br**=brain; **org**=organs; **ts**=testis-related; **o**=oocyte; **em**=embryonic.

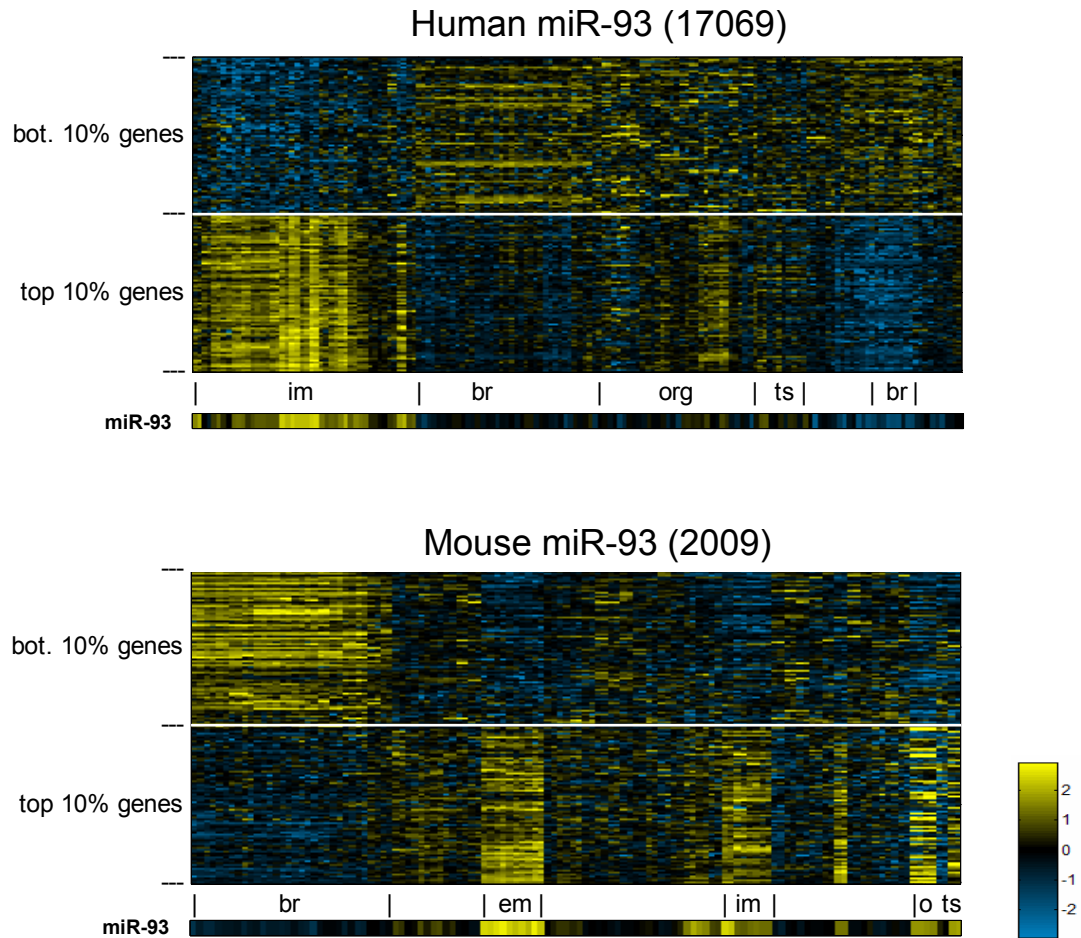

**Figure S6.** Expression pattern of genes that are highly positively or negatively correlated with *miR-93* in the human and mouse expression atlases. Conditions: **im**=immune/cancer; **br**=brain; **org**=organs; **ts**=testis-related; **o**=oocyte; **em**=embryonic. Note that the expression profile of *mir-93* in mouse is characterized by upregulation in oocyte and embryonic development. But these conditions are not in the human data set.

**Table S3** Human CE analysis result

| miRNA        | chr   | seed match | probe | CE score     |              |              |
|--------------|-------|------------|-------|--------------|--------------|--------------|
|              |       |            |       | top 10% set  | mid 10% set  | bot. 10% set |
| hsa-mir-101  | chr9  | GUACUGU    | 6448  | -3.43E-02    | 0.144708667  | 2.153846342  |
| hsa-mir-101  | chr9  | UACUGUA    | 6448  | 6.46E-03     | 0.477649176  | 1.492158046  |
| hsa-mir-103  | chr20 | AUGCUGC    | 16412 | 1.373564491  | -1.758397791 | -0.563726294 |
| hsa-mir-103  | chr20 | UGCUGCU    | 16412 | 1.789632306  | -1.00108365  | -0.774265335 |
| hsa-mir-103  | chr5  | AUGCUGC    | 7421  | 2.108463096  | -1.122536977 | -0.249101792 |
| hsa-mir-103  | chr5  | UGCUGCU    | 7421  | 4.358472479  | -0.734517159 | -0.958242607 |
| hsa-mir-103  | chr5  | AUGCUGC    | 9785  | -0.816834662 | 0.481643486  | 1.487954698  |
| hsa-mir-103  | chr5  | UGCUGCU    | 9785  | 0.429459833  | -2.062941414 | 0.929440859  |
| hsa-mir-105  | chrX  | CAUUUGA    | 17935 | 0.995697214  | -1.027888658 | -1.591638863 |
| hsa-mir-105  | chrX  | GCAUUUG    | 17935 | -0.3940282   | -0.256080789 | 1.37E-02     |
| hsa-mir-106b | chr7  | CACUUUA    | 3161  | -2.424367129 | 0.798307053  | 0.45107418   |
| hsa-mir-106b | chr7  | GCACUUU    | 3161  | 0.694150075  | -0.195232503 | 1.06825509   |
| hsa-mir-106b | chr7  | CACUUUA    | 17069 | -1.396005511 | 0.01511622   | 0.337602669  |
| hsa-mir-106b | chr7  | GCACUUU    | 17069 | 0.734359105  | -1.22043724  | 0.856008461  |
| hsa-mir-126* | chr9  | AAUAAUG    | 3324  | 0.016020104  | 0.854269492  | 0.410808525  |
| hsa-mir-126* | chr9  | UAAUAAU    | 3324  | 0.846307279  | -1.189667925 | 0.279668513  |
| hsa-mir-128a | chr2  | ACUGUGA    | 10775 | 0.548462919  | -1.317619508 | -1.222927661 |
| hsa-mir-128a | chr2  | CACUGUG    | 10775 | 3.778439032  | -1.739970638 | -2.061755286 |
| hsa-mir-128b | chr3  | ACUGUGA    | 4902  | 2.23522211   | -1.833601587 | -0.202259896 |
| hsa-mir-128b | chr3  | CACUGUG    | 4902  | 2.84743495   | -1.189737296 | 1.153799865  |
| hsa-mir-139  | chr11 | ACUGUAG    | 6105  | 1.129995776  | 0.348843093  | -0.029932489 |
| hsa-mir-139  | chr11 | CUGUAGA    | 6105  | 0.775230853  | -1.285331058 | -0.324052204 |
| hsa-mir-140  | chr16 | AAACCAC    | 633   | 0.800785057  | -0.498727546 | 1.140249574  |
| hsa-mir-140  | chr16 | AACCACU    | 633   | 0.979908015  | 0.433214945  | -0.836974061 |
| hsa-mir-148b | chr12 | GCACUGA    | 11039 | 0.341774367  | 0.267290045  | 1.261098069  |
| hsa-mir-148b | chr12 | UGCACUG    | 11039 | -1.070478465 | 0.692426841  | -2.115065639 |
| hsa-mir-149  | chr2  | AGCCAGA    | 14955 | 2.557240659  | -1.754264578 | -0.951750343 |
| hsa-mir-149  | chr2  | GAGCCAG    | 14955 | 2.824297596  | -1.48154765  | 0.84576229   |
| hsa-mir-151  | chr8  | AGUCUAG    | 1953  | 0.708429892  | -1.32903638  | -1.32903638  |
| hsa-mir-151  | chr8  | GUCUAGU    | 1953  | 0.562370967  | -1.180828378 | -1.180828378 |
| hsa-mir-151  | chr8  | AGUCUAG    | 17258 | 1.250448163  | 0.218654346  | -1.32903638  |
| hsa-mir-151  | chr8  | GUCUAGU    | 17258 | 0.146999248  | 0.106762047  | 0.842528005  |
| hsa-mir-152  | chr17 | GCACUGA    | 12183 | -1.998180408 | -0.281818358 | 2.57318448   |
| hsa-mir-152  | chr17 | UGCACUG    | 12183 | -1.139479892 | 5.95E-02     | 1.38637626   |
| hsa-mir-153  | chr2  | CUAUGCA    | 7389  | 2.117392857  | 1.487070075  | -0.589392815 |
| hsa-mir-153  | chr2  | UAUGCAA    | 7389  | 2.019507305  | -1.359908138 | -0.347374898 |
| hsa-mir-153  | chr7  | CUAUGCA    | 907   | 2.241698373  | -1.475813466 | -0.363960875 |
| hsa-mir-153  | chr7  | UAUGCAA    | 907   | 2.237159976  | -1.100642345 | 0.171663418  |
| hsa-mir-153  | chr7  | CUAUGCA    | 11066 | 1.728938119  | -0.180275591 | 0.281630952  |
| hsa-mir-153  | chr7  | UAUGCAA    | 11066 | 1.551224287  | -1.313565943 | 0.391411824  |
| hsa-mir-153  | chr7  | CUAUGCA    | 13609 | 2.269498628  | -0.117867879 | 0.335567865  |
| hsa-mir-153  | chr7  | UAUGCAA    | 13609 | 1.211489548  | -7.25E-02    | -0.994180546 |
| hsa-mir-15a  | chr13 | GCUGCUA    | 9834  | 0.337238482  | 0.272494156  | 0.272494156  |
| hsa-mir-15a  | chr13 | UGCUGCU    | 9834  | 2.137937712  | -1.240993492 | 1.737556591  |
| hsa-mir-15b  | chr3  | GCUGCUA    | 1744  | 0.932431937  | -0.862811282 | 0.630746095  |
| hsa-mir-15b  | chr3  | UGCUGCU    | 1744  | 3.167841473  | 0.104900721  | 2.85686503   |
| hsa-mir-15b  | chr3  | GCUGCUA    | 2413  | 0.457796883  | -1.325115839 | 0.516756841  |

|             |       |         |       |              |              |              |
|-------------|-------|---------|-------|--------------|--------------|--------------|
| hsa-mir-15b | chr3  | UGCUGCU | 2413  | 2.759041758  | -0.8579839   | 2.452912457  |
| hsa-mir-16  | chr13 | GCUGCUA | 9834  | 0.337238482  | 0.272494156  | 0.272494156  |
| hsa-mir-16  | chr13 | UGCUGCU | 9834  | 2.137937712  | -1.240993492 | 1.737556591  |
| hsa-mir-16  | chr3  | GCUGCUA | 1744  | 0.932431937  | -0.862811282 | 0.630746095  |
| hsa-mir-16  | chr3  | UGCUGCU | 1744  | 3.167841473  | 0.104900721  | 2.85686503   |
| hsa-mir-16  | chr3  | GCUGCUA | 2413  | 0.457796883  | -1.325115839 | 0.516756841  |
| hsa-mir-16  | chr3  | UGCUGCU | 2413  | 2.759041758  | -0.8579839   | 2.452912457  |
| hsa-mir-190 | chr15 | ACAUAUC | 5300  | 0.501149467  | 0.303956201  | 0.476293173  |
| hsa-mir-190 | chr15 | CAUAUCA | 5300  | 1.963658004  | -0.96966147  | 0.162812288  |
| hsa-mir-190 | chr15 | ACAUAUC | 18809 | 1.768820463  | -0.338560988 | 1.047409883  |
| hsa-mir-190 | chr15 | CAUAUCA | 18809 | 3.229244855  | 0.245252907  | -3.24E-02    |
| hsa-mir-198 | chr3  | CUGGACC | 1448  | 4.223604438  | 0.190191429  | -1.507492969 |
| hsa-mir-198 | chr3  | UCUGGAC | 1448  | 5.277075356  | -0.495545909 | -0.800632758 |
| hsa-mir-198 | chr3  | CUGGACC | 12019 | -1.606299998 | 1.408681266  | 0.836928342  |
| hsa-mir-198 | chr3  | UCUGGAC | 12019 | -0.822183573 | -0.177111966 | -1.190205196 |
| hsa-mir-198 | chr7  | CUGGACC | 1448  | 4.223604438  | 0.190191429  | -1.507492969 |
| hsa-mir-198 | chr7  | UCUGGAC | 1448  | 5.277075356  | -0.495545909 | -0.800632758 |
| hsa-mir-204 | chr9  | AAAGGGA | 5193  | 0.520161605  | 0.325649871  | -0.540084245 |
| hsa-mir-204 | chr9  | AAGGGAA | 5193  | 0.816343758  | -0.585268146 | -2.238598107 |
| hsa-mir-204 | chr9  | AAAGGGA | 13109 | -1.35143896  | -7.78E-02    | 1.186314943  |
| hsa-mir-204 | chr9  | AAGGGAA | 13109 | -1.041537553 | -0.639570928 | -0.29743713  |
| hsa-mir-208 | chr14 | CGUCUUA | 10152 | 1.781385007  | -0.860204711 | 0.196431176  |
| hsa-mir-208 | chr14 | GUCUUUA | 10152 | -2.076060777 | 1.377238258  | 2.296623066  |
| hsa-mir-211 | chr15 | AAAGGGA | 8064  | -0.835099143 | -5.16E-02    | 1.253730118  |
| hsa-mir-211 | chr15 | AAGGGAA | 8064  | -1.403841986 | -0.566758158 | 0.426520447  |
| hsa-mir-218 | chr4  | AAGCACA | 2221  | 2.37467716   | -1.654968412 | -0.910671689 |
| hsa-mir-218 | chr4  | AGCACAA | 2221  | 1.576519042  | -1.371794392 | -1.107094427 |
| hsa-mir-218 | chr5  | AAGCACA | 7811  | -1.285156772 | -0.950903944 | 2.47075968   |
| hsa-mir-218 | chr5  | AGCACAA | 7811  | -0.807101135 | -0.54044043  | 1.658898777  |
| hsa-mir-218 | chr5  | AAGCACA | 7898  | 0.356644353  | -1.035877242 | 1.238801144  |
| hsa-mir-218 | chr5  | AGCACAA | 7898  | -0.299420178 | -1.412912833 | 1.829459636  |
| hsa-mir-22  | chr17 | GCAGCUU | 6070  | 0.494828806  | -0.514093184 | 0.762428187  |
| hsa-mir-22  | chr17 | GGCAGCU | 6070  | 0.733863968  | -0.84822566  | 1.589680369  |
| hsa-mir-224 | chrX  | GUGACUU | 17624 | -0.220311909 | -1.697889846 | -0.124499481 |
| hsa-mir-224 | chrX  | UGACUUG | 17624 | -0.445310729 | 8.40E-02     | -0.791168129 |
| hsa-mir-23b | chr9  | AAUGUGA | 9276  | 1.78526078   | 0.732607649  | 0.502213331  |
| hsa-mir-23b | chr9  | AUGUGAU | 9276  | 0.931701629  | 0.209520615  | 7.44E-02     |
| hsa-mir-24  | chr9  | CUGAGCC | 9276  | 1.964009397  | -0.432916364 | 1.291936038  |
| hsa-mir-24  | chr9  | UGAGCCA | 9276  | 2.630122028  | -0.567966092 | 0.855185972  |
| hsa-mir-25  | chr7  | GUGCAAU | 3161  | -1.998655335 | -0.686835573 | -0.23383492  |
| hsa-mir-25  | chr7  | UGCAAUG | 3161  | 2.098853161  | -1.15586382  | 0.56502904   |
| hsa-mir-25  | chr7  | GUGCAAU | 17069 | -1.598880805 | -0.644683172 | 0.230568683  |
| hsa-mir-25  | chr7  | UGCAAUG | 17069 | 1.487487638  | -0.46088286  | 0.361606576  |
| hsa-mir-26a | chr12 | ACUUGAA | 17350 | -0.337602726 | 9.81E-02     | 0.935925462  |
| hsa-mir-26a | chr12 | UACUUGA | 17350 | 0.836315949  | 0.734126137  | 2.300494472  |
| hsa-mir-26a | chr3  | ACUUGAA | 8164  | 0.75469845   | 1.109449313  | -3.330336667 |
| hsa-mir-26a | chr3  | UACUUGA | 8164  | 0.983476591  | 0.187561063  | -3.580187074 |
| hsa-mir-26a | chr3  | ACUUGAA | 8998  | -0.389411477 | -1.082061812 | 2.860794683  |
| hsa-mir-26a | chr3  | UACUUGA | 8998  | -1.380268587 | -0.482393433 | 3.654833252  |
| hsa-mir-26a | chr3  | ACUUGAA | 16468 | -6.16E-02    | -0.837715775 | -2.015858395 |

|                |       |          |       |              |              |              |
|----------------|-------|----------|-------|--------------|--------------|--------------|
| hsa-mir-26a    | chr3  | UACUUGA  | 16468 | 1.137644883  | -1.53E-02    | -0.591721172 |
| hsa-mir-26b    | chr2  | ACUUGAA  | 5475  | -1.232439845 | 1.36695187   | 1.258106818  |
| hsa-mir-26b    | chr2  | UACUUGA  | 5475  | 0.561189531  | 2.058113912  | 1.991846904  |
| hsa-mir-27b    | chr9  | ACUGUGA  | 9276  | 1.136867288  | 0.873402645  | 0.433272646  |
| hsa-mir-27b    | chr9  | CUGUGAA  | 9276  | 0.526404853  | 1.416036377  | 0.458079172  |
| hsa-mir-28     | chr3  | AGCUCCU  | 8588  | -0.859233934 | 0.884406855  | 1.754065712  |
| hsa-mir-28     | chr3  | GCUCUUU  | 8588  | -1.86E-02    | -0.266304076 | 0.779935788  |
| hsa-mir-28     | chr3  | AGCUCCU  | 14077 | -1.556889012 | -0.753858948 | -8.77E-03    |
| hsa-mir-28     | chr3  | GCUCUUU  | 14077 | 0.266593798  | -0.474900186 | 9.93E-02     |
| hsa-mir-30c    | chr1  | GUUUACA  | 4066  | 0.369074172  | 8.59E-02     | 0.879438924  |
| hsa-mir-30c    | chr1  | UGUUUAC  | 4066  | -0.141723149 | 0.86656161   | 1.318032398  |
| hsa-mir-30c    | chr1  | GUUUACA  | 4542  | -0.49597545  | -0.107960638 | 0.700178885  |
| hsa-mir-30c    | chr1  | UGUUUAC  | 4542  | 0.944214585  | 0.18619829   | 0.415090822  |
| hsa-mir-30c    | chr1  | GUUUACA  | 14965 | 0.306293201  | -9.53E-02    | 0.156056271  |
| hsa-mir-30c    | chr1  | UGUUUAC  | 14965 | -0.666181714 | 1.249163972  | 1.422838116  |
| hsa-mir-30c    | chr1  | GUUUACA  | 19201 | -0.250585019 | 0.482821594  | 1.204744982  |
| hsa-mir-30c    | chr1  | UGUUUAC  | 19201 | -2.174226931 | 1.225464646  | 2.801847216  |
| hsa-mir-30e-3p | chr1  | ACUGAAA  | 4066  | 0.475744319  | -2.248931028 | -0.799438248 |
| hsa-mir-30e-3p | chr1  | CUGAAAG  | 4066  | -0.707535199 | -0.797974234 | -1.363025693 |
| hsa-mir-30e-3p | chr1  | ACUGAAA  | 4542  | 2.359744491  | 0.130473101  | 0.324167269  |
| hsa-mir-30e-3p | chr1  | CUGAAAG  | 4542  | 0.548638074  | -0.593700737 | -0.34335051  |
| hsa-mir-30e-3p | chr1  | ACUGAAA  | 14965 | 2.030415133  | -2.266445352 | -0.311114815 |
| hsa-mir-30e-3p | chr1  | CUGAAAG  | 14965 | 0.186767047  | -0.623297697 | -0.652115789 |
| hsa-mir-30e-3p | chr1  | ACUGAAA  | 19201 | 2.490683968  | -0.363951872 | -1.108839105 |
| hsa-mir-30e-3p | chr1  | CUGAAAG  | 19201 | -0.946846283 | -0.693948505 | -0.258268522 |
| hsa-mir-30e-5p | chr1  | GUUUACA  | 4066  | 0.369074172  | 8.59E-02     | 0.879438924  |
| hsa-mir-30e-5p | chr1  | UGUUUAC  | 4066  | -0.141723149 | 0.86656161   | 1.318032398  |
| hsa-mir-30e-5p | chr1  | GUUUACA  | 4542  | -0.49597545  | -0.107960638 | 0.700178885  |
| hsa-mir-30e-5p | chr1  | UGUUUAC  | 4542  | 0.944214585  | 0.18619829   | 0.415090822  |
| hsa-mir-30e-5p | chr1  | GUUUACA  | 14965 | 0.306293201  | -9.53E-02    | 0.156056271  |
| hsa-mir-30e-5p | chr1  | UGUUUAC  | 14965 | -0.666181714 | 1.249163972  | 1.422838116  |
| hsa-mir-30e-5p | chr1  | GUUUACA  | 19201 | -0.250585019 | 0.482821594  | 1.204744982  |
| hsa-mir-30e-5p | chr1  | UGUUUAC  | 19201 | -2.174226931 | 1.225464646  | 2.801847216  |
| hsa-mir-326    | chr11 | CCAGAGG  | 18973 | 1.816203196  | -0.102066616 | -0.384483749 |
| hsa-mir-326    | chr11 | CCCAGAG  | 18973 | 0.689465166  | -1.445057958 | 1.090028935  |
| hsa-mir-33     | chr22 | AAUGCAC  | 3955  | -1.182277697 | 1.905620573  | -2.365243937 |
| hsa-mir-33     | chr22 | CAAUGCA  | 3955  | -1.610131396 | 0.132854704  | -1.349746277 |
| hsa-mir-33     | chr22 | AAUGCAC  | 9716  | -0.364892861 | -0.192448802 | -2.74062521  |
| hsa-mir-33     | chr22 | CAAUGCA  | 9716  | 0.572143884  | -0.607317475 | -1.664237395 |
| hsa-mir-330    | chr19 | GCUUUGC  | 11586 | 1.085800376  | 1.856591378  | 0.774626613  |
| hsa-mir-330    | chr19 | UGC UUUG | 11586 | 2.183257241  | 1.26879245   | -2.189110425 |
| hsa-mir-330    | chr19 | GCUUUGC  | 18833 | 3.047410196  | -0.848272039 | -0.475715878 |
| hsa-mir-330    | chr19 | UGC UUUG | 18833 | 0.519860444  | 0.461934604  | -0.903702408 |
| hsa-mir-335    | chr7  | CUCUUGA  | 14117 | 1.749307997  | 0.175981939  | -0.278275566 |
| hsa-mir-335    | chr7  | GCUCUUG  | 14117 | 0.3045291    | -0.585865536 | -1.436048801 |
| hsa-mir-342    | chr14 | GUGUGAG  | 3585  | -0.148595616 | -1.619218408 | -1.386819352 |
| hsa-mir-342    | chr14 | UGUGAGA  | 3585  | 0.882077331  | -1.773075813 | -0.268398443 |
| hsa-mir-361    | chrX  | CUGAUAA  | 14688 | -1.434780455 | 0.382453284  | -1.873787259 |
| hsa-mir-361    | chrX  | UCUGAUA  | 14688 | -1.281125905 | -1.010236934 | -0.270427926 |
| hsa-mir-448    | chrX  | AUAUGCA  | 12397 | 0.371637069  | -0.551228093 | -2.526042621 |



|              |       |         |       |              |              |              |
|--------------|-------|---------|-------|--------------|--------------|--------------|
| hsa-mir-448  | chrX  | UAUGCAA | 12397 | -5.31E-02    | -0.232931575 | -0.52574863  |
| hsa-mir-448  | chrX  | AUAUGCA | 19022 | 1.910236298  | -0.244149394 | -1.037829724 |
| hsa-mir-448  | chrX  | UAUGCAA | 19022 | 1.554089077  | -0.572549658 | 0.333688439  |
| hsa-mir-452  | chrX  | GCAAACA | 17624 | -0.353498987 | 3.316853507  | 0.277147722  |
| hsa-mir-452  | chrX  | UGCAAAC | 17624 | 0.165354424  | 2.496373909  | 0.588406962  |
| hsa-mir-452* | chrX  | AGACUGA | 17624 | 1.053261551  | 1.2134798    | 1.741671832  |
| hsa-mir-452* | chrX  | GAGACUG | 17624 | 0.996187033  | 0.165440293  | 2.269998701  |
| hsa-mir-483  | chr11 | AGGAGUG | 1388  | 0.340326293  | -0.204006453 | 2.314685746  |
| hsa-mir-483  | chr11 | GGAGUGA | 1388  | -0.215691823 | 1.267590956  | 1.267590956  |
| hsa-mir-483  | chr11 | AGGAGUG | 7321  | -0.94073507  | 1.017069816  | 3.557070572  |
| hsa-mir-483  | chr11 | GGAGUGA | 7321  | -1.415502782 | -0.690342312 | 1.681238829  |
| hsa-mir-483  | chr11 | AGGAGUG | 12401 | -1.620187722 | 0.58254922   | 2.978170671  |
| hsa-mir-483  | chr11 | GGAGUGA | 12401 | -0.737521427 | 9.28E-02     | 1.121476533  |
| hsa-mir-488  | chr1  | AUCUGGG | 4472  | 1.877372578  | 0.479230492  | -0.900570031 |
| hsa-mir-488  | chr1  | UAUCUGG | 4472  | -3.41E-02    | -1.026215044 | -2.322316598 |
| hsa-mir-489  | chr7  | AUGUCAC | 2657  | 0.736818243  | 0.069605185  | -2.163251374 |
| hsa-mir-489  | chr7  | UGUCACU | 2657  | -0.577117425 | 0.730872688  | -1.113720029 |
| hsa-mir-490  | chr7  | CAGGUUG | 3587  | 0.183631333  | 1.266844284  | -0.486510553 |
| hsa-mir-490  | chr7  | CCAGGUU | 3587  | -1.111773215 | -0.313877408 | 0.120114195  |
| hsa-mir-491  | chr9  | CCCCACU | 3814  | 2.347571234  | 1.372438782  | -0.248125768 |
| hsa-mir-491  | chr9  | UCCCCAC | 3814  | 1.067443774  | -1.599225719 | 1.108320266  |
| hsa-mir-504  | chrX  | AGGGUCU | 16710 | 0.840622608  | -0.203807703 | -0.861411973 |
| hsa-mir-504  | chrX  | CAGGGUC | 16710 | 0.394375423  | 1.082938587  | -0.83537911  |
| hsa-mir-511  | chr10 | AAAGACA | 33    | 0.774852508  | -1.285497267 | 0.713030775  |
| hsa-mir-511  | chr10 | AAGACAC | 33    | 0.939965611  | 1.153952885  | 1.583975159  |
| hsa-mir-7    | chr9  | GUCUUCC | 1424  | -0.348502501 | 1.526535198  | -1.434700282 |
| hsa-mir-7    | chr9  | UCUUCCA | 1424  | 1.819179394  | 1.130960433  | -2.039475163 |
| hsa-mir-7    | chr9  | GUCUUCC | 15282 | 0.105004489  | 2.215788284  | -0.502209734 |
| hsa-mir-7    | chr9  | UCUUCCA | 15282 | 1.077021075  | 0.306610903  | -1.092765929 |
| hsa-mir-9    | chr1  | ACCAAAG | 2756  | 3.740852639  | -1.700874839 | 1.166617935  |
| hsa-mir-9    | chr1  | CCAAAGA | 2756  | 2.64695072   | -2.718755781 | 1.604031247  |
| hsa-mir-9*   | chr1  | AGCUUUA | 2756  | 4.038434533  | 0.019772424  | -3.211644082 |
| hsa-mir-9*   | chr1  | UAGCUUU | 2756  | 1.521160395  | -0.258016033 | -1.770038631 |
| hsa-mir-93   | chr7  | AGCACUU | 3161  | 1.497903519  | 0.135700221  | -0.527458814 |
| hsa-mir-93   | chr7  | GCACUUU | 3161  | 0.694150075  | -0.195232503 | 1.06825509   |
| hsa-mir-93   | chr7  | AGCACUU | 17069 | 1.302675811  | -1.262315934 | -0.773001306 |
| hsa-mir-93   | chr7  | GCACUUU | 17069 | 0.734359105  | -1.22043724  | 0.856008461  |

**Table S4** Mouse CE analysis result

| miRNA        | chr   | seed match | probe | CE score     |              |              |
|--------------|-------|------------|-------|--------------|--------------|--------------|
|              |       |            |       | top 10% set  | Mid 10% set  | bot. 10% set |
| mmu-let-7f   | chrX  | CUACCUC    | 3698  | 2.133981335  | -0.679091539 | -3.196346252 |
| mmu-let-7f   | chrX  | UACCUCA    | 3698  | 1.739624936  | -1.15344594  | -1.754266614 |
| mmu-mir-101b | chr19 | GUACUGU    | 15550 | 1.468836017  | -0.470033126 | -0.77192534  |
| mmu-mir-101b | chr19 | UACUGUA    | 15550 | -0.41684731  | 0.392328445  | -0.522222169 |
| mmu-mir-103  | chr11 | AUGCUGC    | 11360 | 0.758818574  | 0.284730202  | 1.064599548  |
| mmu-mir-103  | chr11 | UGCUGCU    | 11360 | 2.148309523  | -1.973012567 | 1.786995722  |
| mmu-mir-106b | chr5  | CACUUUA    | 2009  | -0.629479365 | 1.545394025  | 1.169930273  |
| mmu-mir-106b | chr5  | GCACUUU    | 2009  | 0.629001852  | -0.564723618 | 1.980320016  |
| mmu-mir-107  | chr19 | AUGCUGC    | 6768  | -1.740013946 | -0.294022458 | 1.463952718  |
| mmu-mir-107  | chr19 | UGCUGCU    | 6768  | -0.987412972 | -1.242262741 | 1.360496961  |
| mmu-mir-10b  | chr2  | CUACAGG    | 4451  | 0.277288463  | -1.054574202 | -1.799514336 |
| mmu-mir-10b  | chr2  | UACAGGG    | 4451  | 0.282631629  | -0.154918652 | 0.299434635  |
| mmu-mir-10b  | chr2  | CUACAGG    | 5528  | -0.391271342 | -0.771496951 | -1.799514336 |
| mmu-mir-10b  | chr2  | UACAGGG    | 5528  | 1.37177194   | 0.651068277  | -0.944557417 |
| mmu-mir-128a | chr1  | ACUGUGA    | 7375  | 3.024138513  | -0.604962256 | 0.435420171  |
| mmu-mir-128a | chr1  | CACUGUG    | 7375  | 4.138260142  | -0.729309148 | -1.505769897 |
| mmu-mir-128b | chr9  | ACUGUGA    | 8538  | 1.741701215  | -1.221957969 | -0.183218351 |
| mmu-mir-128b | chr9  | CACUGUG    | 8538  | 3.104755497  | -0.58906666  | -1.620261428 |
| mmu-mir-130b | chr16 | UGCACUG    | 4241  | 1.487685383  | 0.569955     | 1.833903627  |
| mmu-mir-130b | chr16 | UUGCACU    | 4241  | -2.041204907 | 0.385170704  | 1.799432312  |
| mmu-mir-130b | chr16 | UGCACUG    | 6417  | -0.694525979 | 1.347216447  | 1.722626032  |
| mmu-mir-130b | chr16 | UUGCACU    | 6417  | -2.170344238 | -1.197846017 | 3.620171081  |
| mmu-mir-130b | chr18 | UGCACUG    | 4241  | 1.487685383  | 0.569955     | 1.833903627  |
| mmu-mir-130b | chr18 | UUGCACU    | 4241  | -2.041204907 | 0.385170704  | 1.799432312  |
| mmu-mir-130b | chr18 | UGCACUG    | 6417  | -0.694525979 | 1.347216447  | 1.722626032  |
| mmu-mir-130b | chr18 | UUGCACU    | 6417  | -2.170344238 | -1.197846017 | 3.620171081  |
| mmu-mir-140  | chr8  | AACCACU    | 8359  | 1.968133316  | 0.229594855  | -2.819271033 |
| mmu-mir-140  | chr8  | ACCACUG    | 8359  | 1.323914038  | -0.219249147 | -2.491596584 |
| mmu-mir-148b | chr15 | GCACUGA    | 14669 | 0.365400902  | 0.63704002   | 3.306207999  |
| mmu-mir-148b | chr15 | UGCACUG    | 14669 | 1.36722146   | 2.190627804  | 1.359776557  |
| mmu-mir-149  | chr1  | AGCCAGA    | 8992  | 1.185198851  | -1.875587391 | -2.109009328 |
| mmu-mir-149  | chr1  | GAGCCAG    | 8992  | 1.534809261  | -1.14511397  | 0.027790775  |
| mmu-mir-151  | chr15 | AGUCUAG    | 9001  | 0.210371989  | -0.192947137 | 1.027393797  |
| mmu-mir-151  | chr15 | CAGUCUA    | 9001  | 0.350227463  | -0.621725072 | -0.857349929 |
| mmu-mir-152  | chr11 | GCACUGA    | 16072 | -2.71E-02    | -2.269468121 | 2.462162872  |
| mmu-mir-152  | chr11 | UGCACUG    | 16072 | 0.432487218  | -2.275644923 | 2.332239991  |
| mmu-mir-153  | chr12 | CUAUGCA    | 7200  | 4.203877717  | -1.222418798 | -2.09959291  |
| mmu-mir-153  | chr12 | UAUGCAA    | 7200  | 0.678763439  | -1.705519719 | -2.223948217 |
| mmu-mir-15b  | chr3  | GCUGCUA    | 2961  | -4.19E-02    | -1.571319258 | 1.770993474  |
| mmu-mir-15b  | chr3  | UGCUGCU    | 2961  | 0.766150301  | -2.169111727 | 2.14880026   |
| mmu-mir-16   | chr3  | GCUGCUA    | 2961  | -4.19E-02    | -1.571319258 | 1.770993474  |
| mmu-mir-16   | chr3  | UGCUGCU    | 2961  | 0.766150301  | -2.169111727 | 2.14880026   |
| mmu-mir-207  | chr4  | GAGAAGC    | 1475  | -0.636933864 | -0.887841957 | 1.403624095  |
| mmu-mir-207  | chr4  | GGAGAAG    | 1475  | -1.155038334 | -1.467526537 | 2.124465435  |
| mmu-mir-208  | chr14 | CGUCUUA    | 1530  | 4.095974693  | -0.604149335 | -0.604149335 |
| mmu-mir-208  | chr14 | GUCUUAU    | 1530  | 0.20081756   | -0.26188709  | -0.052224045 |
| mmu-mir-208  | chr14 | CGUCUUA    | 13277 | 3.760251548  | -0.604149335 | -0.604149335 |

|             |       |          |       |              |              |              |
|-------------|-------|----------|-------|--------------|--------------|--------------|
| mmu-mir-208 | chr14 | GUCUUUAU | 13277 | 1.621402011  | -0.465196709 | 1.05E-02     |
| mmu-mir-218 | chr5  | AAGCACA  | 2813  | 2.074397758  | -0.866841733 | -1.709771672 |
| mmu-mir-218 | chr5  | AGCACAA  | 2813  | 0.966153207  | 1.883723127  | -3.325015452 |
| mmu-mir-218 | chr5  | AAGCACA  | 5628  | 5.006299981  | -1.523924842 | -1.686068326 |
| mmu-mir-218 | chr5  | AGCACAA  | 5628  | 5.210934325  | -2.498629043 | -0.894911126 |
| mmu-mir-218 | chr5  | AAGCACA  | 11976 | 3.628492681  | -0.102865104 | -1.310200987 |
| mmu-mir-218 | chr5  | AGCACAA  | 11976 | 4.810508326  | -0.562510492 | -2.468090004 |
| mmu-mir-224 | chrX  | GUGACUU  | 3923  | -2.825566734 | -0.946524501 | 1.791210248  |
| mmu-mir-224 | chrX  | UGACUUA  | 3923  | -0.886359981 | -1.937024479 | 1.404307513  |
| mmu-mir-25  | chr5  | GUGCAAU  | 2009  | -1.727344324 | -0.753665445 | -0.149936338 |
| mmu-mir-25  | chr5  | UGCAAUG  | 2009  | -1.160455636 | 0.427668108  | 0.418236377  |
| mmu-mir-26a | chr9  | ACUUGAA  | 14735 | 1.680839011  | -0.84848527  | -2.571214012 |
| mmu-mir-26a | chr9  | UACUUGA  | 14735 | 1.122812125  | -0.232014466 | -3.237892447 |
| mmu-mir-26b | chr1  | ACUUGAA  | 12209 | 1.59468198   | -0.158906119 | 0.983094382  |
| mmu-mir-26b | chr1  | UACUUGA  | 12209 | 1.117832162  | 0.786506172  | 0.832013137  |
| mmu-mir-28  | chr16 | AGCUCCU  | 1024  | -1.465639731 | -0.655384012 | 0.799269712  |
| mmu-mir-28  | chr16 | GCUCUUU  | 1024  | -0.268504126 | 1.660713725  | -0.422832153 |
| mmu-mir-301 | chr11 | UGCACUG  | 14038 | 1.128984544  | 1.184692961  | -0.856459077 |
| mmu-mir-301 | chr11 | UUGCACU  | 14038 | 0.291462937  | -1.174126548 | 0.160429224  |
| mmu-mir-30c | chr4  | GUUUACA  | 10024 | 1.715307342  | -1.02820206  | 0.667938692  |
| mmu-mir-30c | chr4  | UGUUUAC  | 10024 | 2.27910956   | -0.260486256 | -0.674577103 |
| mmu-mir-30c | chr4  | GUUUACA  | 10221 | 0.345922742  | -1.662317083 | 3.334969675  |
| mmu-mir-30c | chr4  | UGUUUAC  | 10221 | 2.657293728  | -2.154549433 | 0.565801196  |
| mmu-mir-30e | chr4  | GUUUACA  | 10024 | 1.715307342  | -1.02820206  | 0.667938692  |
| mmu-mir-30e | chr4  | UGUUUAC  | 10024 | 2.27910956   | -0.260486256 | -0.674577103 |
| mmu-mir-30e | chr4  | GUUUACA  | 10221 | 0.345922742  | -1.662317083 | 3.334969675  |
| mmu-mir-30e | chr4  | UGUUUAC  | 10221 | 2.657293728  | -2.154549433 | 0.565801196  |
| mmu-mir-32  | chr4  | GUGCAAU  | 10401 | -0.915431714 | 7.18E-02     | -1.52894058  |
| mmu-mir-32  | chr4  | UGCAAUA  | 10401 | -2.00585798  | 0.203847848  | 1.030180914  |
| mmu-mir-326 | chr7  | CCAGAGG  | 4674  | 1.957009489  | -0.290828546 | -1.748786848 |
| mmu-mir-326 | chr7  | CCCAGAG  | 4674  | 1.579911829  | -0.502432942 | 2.434329379  |
| mmu-mir-335 | chr6  | CUCUUGA  | 9548  | 1.690046699  | 0.312014257  | -0.243595633 |
| mmu-mir-335 | chr6  | GCUCUUG  | 9548  | 0.056262489  | 0.162306147  | -0.289496718 |
| mmu-mir-338 | chr11 | AUGCUGG  | 14026 | 0.708943541  | 0.138291425  | 0.826249892  |
| mmu-mir-338 | chr11 | UGCUGGA  | 14026 | 2.842158744  | -1.437626589 | -1.045174159 |
| mmu-mir-339 | chr5  | ACAGGGA  | 4764  | 1.602229576  | -0.868729767 | 1.850879572  |
| mmu-mir-339 | chr5  | GACAGGG  | 4764  | 1.130614568  | -1.342942914 | -0.998196226 |
| mmu-mir-342 | chr12 | GUGUGAG  | 9770  | 1.153558555  | -1.508131469 | 2.007232326  |
| mmu-mir-342 | chr12 | UGUGAGA  | 9770  | 0.884381942  | -6.58E-02    | 8.63E-03     |
| mmu-mir-346 | chr14 | GCAGACA  | 12224 | 1.992015326  | 0.845778381  | -0.717847786 |
| mmu-mir-346 | chr14 | GGCAGAC  | 12224 | 1.002964509  | 1.522842514  | -0.378926303 |
| mmu-mir-361 | chrX  | CUGAUAA  | 11365 | 1.934198686  | -0.626388389 | 0.201733899  |
| mmu-mir-361 | chrX  | UCUGAUA  | 11365 | 3.944284032  | -1.873657259 | -0.506575734 |
| mmu-mir-378 | chr18 | GUCAGGA  | 14615 | -0.05710494  | 9.25E-02     | -0.583578307 |
| mmu-mir-378 | chr18 | UCAGGAG  | 14615 | -0.150707689 | 0.822874892  | -0.667928897 |
| mmu-mir-448 | chrX  | AUAUGCA  | 2695  | 0.602381392  | -0.039544079 | -1.511652012 |
| mmu-mir-448 | chrX  | UAUGCAA  | 2695  | 1.411550372  | -0.467390483 | -1.594972466 |
| mmu-mir-452 | chrX  | GCAAACA  | 3923  | -9.90E-03    | 0.9197392    | 1.577028484  |
| mmu-mir-452 | chrX  | UGCAAAC  | 3923  | -0.399633631 | -0.085923497 | 0.376422878  |
| mmu-mir-483 | chr7  | AGGAGUG  | 6648  | 0.687118922  | -0.017227769 | -0.972140369 |

|             |       |         |       |              |              |              |
|-------------|-------|---------|-------|--------------|--------------|--------------|
| mmu-mir-483 | chr7  | GGAGUGA | 6648  | -0.882866472 | 5.58E-02     | -0.50927937  |
| mmu-mir-7   | chr13 | GUCUUC  | 15144 | 2.487877797  | 1.408531992  | -1.049148255 |
| mmu-mir-7   | chr13 | UCUCCA  | 15144 | 3.425666751  | -0.846316617 | -0.94722807  |
| mmu-mir-93  | chr5  | CACUUUG | 2009  | 1.554623114  | -0.980944058 | -0.103330085 |
| mmu-mir-93  | chr5  | GCACUUU | 2009  | 0.629001852  | -0.564723618 | 1.980320016  |
| mmu-mir-98  | chrX  | CUACCUC | 3698  | 2.133981335  | -0.679091539 | -3.196346252 |
| mmu-mir-98  | chrX  | UACCUCA | 3698  | 1.739624936  | -1.15344594  | -1.754266614 |

**Table S5** MDEV CE analysis result

| miRNA          | Chr   | seed match | probe | CE score     |              |              |
|----------------|-------|------------|-------|--------------|--------------|--------------|
|                |       |            |       | top 10% set  | mid 10% set  | bot. 10% set |
| Mmu-mir-101b   | chr19 | GUACUGU    | 1046  | -1.893237318 | 0.629846501  | 1.235449784  |
| mmu-mir-101b   | chr19 | UACUGUA    | 1046  | -1.302507466 | -0.638618808 | 2.354354201  |
| mmu-mir-103    | chr11 | AUGCUGC    | 9867  | 2.297403658  | -2.404465235 | -1.476170264 |
| mmu-mir-103    | chr11 | UGCUGCU    | 9867  | 3.102713398  | -1.894411762 | -1.612614581 |
| mmu-mir-103    | chr11 | AUGCUGC    | 12510 | 3.516686678  | 0.351469463  | -2.064926714 |
| mmu-mir-103    | chr11 | UGCUGCU    | 12510 | 2.036127714  | -0.77835592  | -3.033209152 |
| mmu-mir-106b   | chr5  | CACUUUA    | 350   | 1.416736946  | -0.516025979 | 0.676932759  |
| mmu-mir-106b   | chr5  | GCACUUU    | 350   | 1.12391263   | -0.19098518  | 1.918767402  |
| mmu-mir-106b   | chr5  | CACUUUA    | 351   | 1.364203965  | 0.363924698  | 6.21E-02     |
| mmu-mir-106b   | chr5  | GCACUUU    | 351   | 0.676813758  | 0.479737282  | 1.258476368  |
| mmu-mir-106b   | chr5  | CACUUUA    | 14088 | 1.269484056  | -1.729717517 | -1.305846936 |
| mmu-mir-106b   | chr5  | GCACUUU    | 14088 | 0.937770196  | -0.567473014 | 1.302317357  |
| mmu-mir-106b   | chr5  | CACUUUA    | 14408 | 1.100638794  | -0.35077975  | -0.324554232 |
| mmu-mir-106b   | chr5  | GCACUUU    | 14408 | 0.70667383   | -1.885180435 | 1.732990603  |
| mmu-mir-107    | chr19 | AUGCUGC    | 2995  | 1.804930507  | -1.075201242 | -0.689526229 |
| mmu-mir-107    | chr19 | UGCUGCU    | 2995  | 2.419043695  | -0.132895273 | -0.984128653 |
| mmu-mir-107    | chr19 | AUGCUGC    | 12000 | 3.360061406  | -1.837540169 | -2.90108185  |
| mmu-mir-107    | chr19 | UGCUGCU    | 12000 | 3.51634792   | 0.335803863  | -1.673370853 |
| mmu-mir-10b    | chr2  | CUACAGG    | 16564 | -0.469465565 | 0.317977649  | 0.819077877  |
| mmu-mir-10b    | chr2  | UACAGGG    | 16564 | 0.152664666  | 1.011622264  | -1.197125847 |
| mmu-mir-126-5p | chr2  | AAUAAUG    | 5240  | -0.028795859 | -1.755525809 | 0.570933876  |
| mmu-mir-126-5p | chr2  | UAAUAAU    | 5240  | -1.580970093 | 4.77E-02     | 6.01E-02     |
| mmu-mir-126-5p | chr2  | AAUAAUG    | 17737 | -0.504811301 | -1.37858476  | -0.132212521 |
| mmu-mir-126-5p | chr2  | UAAUAAU    | 17737 | -1.163242567 | 1.17061809   | 1.004962212  |
| mmu-mir-126-5p | chr2  | AAUAAUG    | 17738 | -1.600787632 | 0.64330071   | -3.53E-02    |
| mmu-mir-126-5p | chr2  | UAAUAAU    | 17738 | -0.788233916 | -0.473359228 | 0.58942191   |
| mmu-mir-128a   | chr1  | ACUGUGA    | 12602 | -0.439992027 | -0.84397336  | -1.230475676 |
| mmu-mir-128a   | chr1  | CACUGUG    | 12602 | -0.243260735 | -0.21059224  | -3.441060962 |
| mmu-mir-128b   | chr9  | ACUGUGA    | 3304  | -0.930662266 | 1.805848939  | 1.399887305  |
| mmu-mir-128b   | chr9  | CACUGUG    | 3304  | -0.600782188 | 9.47E-02     | -1.309376667 |
| mmu-mir-128b   | chr9  | ACUGUGA    | 17596 | -0.827869097 | 0.460471955  | 1.755745305  |
| mmu-mir-128b   | chr9  | CACUGUG    | 17596 | -0.242351565 | -3.42E-02    | 0.736289109  |
| mmu-mir-139    | chr7  | ACUGUAG    | 18435 | 1.125450144  | 1.283057311  | 1.5057603    |
| mmu-mir-139    | chr7  | CUGUAGA    | 18435 | 0.854498749  | 0.259037306  | 0.675072884  |
| mmu-mir-140    | chr8  | AACCACU    | 14657 | -0.043746814 | -0.588113598 | 1.264605627  |
| mmu-mir-140    | chr8  | ACCACUG    | 14657 | -1.56371621  | -0.599650932 | 0.421269478  |
| mmu-mir-140    | chr8  | AACCACU    | 14658 | -0.269864247 | 0.82540137   | -2.128933518 |
| mmu-mir-140    | chr8  | ACCACUG    | 14658 | 0.475652648  | 0.421269478  | -1.14657258  |
| mmu-mir-148b   | chr15 | GCACUGA    | 18093 | -0.512735698 | -1.039320111 | 6.05E-02     |
| mmu-mir-148b   | chr15 | UGCACUG    | 18093 | -0.768534299 | -0.999714142 | 0.596068938  |
| mmu-mir-149    | chr1  | AGCCAGA    | 1696  | 0.41443586   | 1.105721562  | -1.156347375 |
| mmu-mir-149    | chr1  | GAGCCAG    | 1696  | 0.458776911  | 9.61E-02     | -2.760832251 |
| mmu-mir-152    | chr11 | GCACUGA    | 2744  | 0.861242837  | 1.660255015  | 0.643902678  |
| mmu-mir-152    | chr11 | UGCACUG    | 2744  | -0.859937522 | 2.942808761  | -0.15665893  |
| mmu-mir-153    | chr12 | CUAUGCA    | 9390  | -1.261709681 | 0.811762954  | 0.652437946  |
| mmu-mir-153    | chr12 | UAUGCAA    | 9390  | -1.584515543 | -0.57055206  | 0.367904032  |
| mmu-mir-15b    | chr3  | GUCGCUA    | 10749 | 0.41403527   | -0.453947374 | 1.433672875  |

|             |       |         |       |              |              |              |
|-------------|-------|---------|-------|--------------|--------------|--------------|
| mmu-mir-15b | chr3  | UGCUGCU | 10749 | 2.30565128   | -0.318796815 | -0.698986437 |
| mmu-mir-15b | chr3  | GCUGCUA | 10750 | 0.321068312  | 1.04198282   | 0.447284323  |
| mmu-mir-15b | chr3  | UGCUGCU | 10750 | 0.410453364  | -0.417321565 | -0.206618773 |
| mmu-mir-15b | chr3  | GCUGCUA | 18431 | -0.095783532 | 0.592852313  | 0.668944672  |
| mmu-mir-15b | chr3  | UGCUGCU | 18431 | 1.864416512  | -0.12378576  | -0.863961576 |
| mmu-mir-16  | chr3  | GCUGCUA | 10749 | 0.41403527   | -0.453947374 | 1.433672875  |
| mmu-mir-16  | chr3  | UGCUGCU | 10749 | 2.30565128   | -0.318796815 | -0.698986437 |
| mmu-mir-16  | chr3  | GCUGCUA | 10750 | 0.321068312  | 1.04198282   | 0.447284323  |
| mmu-mir-16  | chr3  | UGCUGCU | 10750 | 0.410453364  | -0.417321565 | -0.206618773 |
| mmu-mir-16  | chr3  | GCUGCUA | 18431 | -0.095783532 | 0.592852313  | 0.668944672  |
| mmu-mir-16  | chr3  | UGCUGCU | 18431 | 1.864416512  | -0.12378576  | -0.863961576 |
| mmu-mir-186 | chr3  | AUUCUUU | 19231 | 2.95780647   | -0.118169548 | -2.509977302 |
| mmu-mir-186 | chr3  | UUCUUUG | 19231 | 3.176445699  | -1.740280562 | -1.365463039 |
| mmu-mir-207 | chr4  | GAGAAGC | 607   | -6.17E-02    | -0.982088924 | 0.358869678  |
| mmu-mir-207 | chr4  | GGAGAAG | 607   | 0.563609962  | 0.673207589  | 1.027101861  |
| mmu-mir-207 | chr4  | GAGAAGC | 20038 | 1.623189828  | -1.157396111 | -0.48782005  |
| mmu-mir-207 | chr4  | GGAGAAG | 20038 | 0.208838386  | -1.603030738 | 0.918089786  |
| mmu-mir-208 | chr14 | CGUCUUA | 2033  | 2.648111644  | -0.744572843 | -0.744572843 |
| mmu-mir-208 | chr14 | GUCUUAU | 2033  | -1.379820815 | 1.225565645  | 0.733986725  |
| mmu-mir-208 | chr14 | CGUCUUA | 15059 | 0.709434794  | -0.744572843 | -0.744572843 |
| mmu-mir-208 | chr14 | GUCUUAU | 15059 | -0.525913437 | 0.92762173   | 0.775028927  |
| mmu-mir-208 | chr14 | CGUCUUA | 15326 | 2.163442431  | -0.744572843 | -0.744572843 |
| mmu-mir-208 | chr14 | GUCUUAU | 15326 | -1.445330213 | 1.338819179  | 2.426579872  |
| mmu-mir-218 | chr5  | AAGCACA | 8429  | 4.79E-02     | -1.531480009 | 0.823149755  |
| mmu-mir-218 | chr5  | AGCACAA | 8429  | 0.919803956  | -0.150543518 | 1.732072723  |
| mmu-mir-218 | chr5  | AAGCACA | 17740 | -1.26E-02    | 0.314890724  | 1.86763686   |
| mmu-mir-218 | chr5  | AGCACAA | 17740 | 1.833414385  | -1.181500031 | 1.414228423  |
| mmu-mir-224 | chrX  | GUGACUU | 5524  | -0.594505484 | 0.419372508  | 1.388227882  |
| mmu-mir-224 | chrX  | UGACUUA | 5524  | -0.25961507  | 0.297916464  | 1.9302449    |
| mmu-mir-25  | chr5  | GUGCAAU | 350   | 1.298912705  | -0.376095572 | 0.776560852  |
| mmu-mir-25  | chr5  | UGCAAUG | 350   | 2.478519602  | -1.847693439 | -0.389539849 |
| mmu-mir-25  | chr5  | GUGCAAU | 351   | 1.091837506  | -1.828550303 | 1.009474263  |
| mmu-mir-25  | chr5  | UGCAAUG | 351   | 2.313251983  | -1.261476287 | -2.50E-02    |
| mmu-mir-25  | chr5  | GUGCAAU | 14088 | 0.242369022  | -1.245265448 | 0.354036241  |
| mmu-mir-25  | chr5  | UGCAAUG | 14088 | 2.512746623  | -0.784456447 | -1.39086684  |
| mmu-mir-25  | chr5  | GUGCAAU | 14408 | 0.217085879  | -2.06542016  | 0.593323138  |
| mmu-mir-25  | chr5  | UGCAAUG | 14408 | 1.381808702  | 2.280002877  | -0.28017833  |
| mmu-mir-26a | chr9  | ACUUGAA | 6363  | -0.281706667 | -0.185270229 | -0.100025545 |
| mmu-mir-26a | chr9  | UACUUGA | 6363  | 1.172565623  | -0.406060912 | 1.840941151  |
| mmu-mir-26b | chr1  | ACUUGAA | 18303 | 1.414195349  | -2.031443551 | 1.525697826  |
| mmu-mir-26b | chr1  | UACUUGA | 18303 | 0.629304726  | -2.49278239  | 1.449151808  |
| mmu-mir-301 | chr11 | UGCACUG | 7279  | 0.40287486   | -0.378798545 | -1.184938964 |
| mmu-mir-301 | chr11 | UUGCACU | 7279  | -0.870917957 | 0.694392025  | -1.439864261 |
| mmu-mir-30c | chr4  | GUUUACA | 15463 | -1.386243274 | 0.433118484  | -2.334837922 |
| mmu-mir-30c | chr4  | UGUUUAC | 15463 | 0.796759112  | 0.603173679  | -1.43747591  |
| mmu-mir-30e | chr4  | GUUUACA | 15463 | -1.386243274 | 0.433118484  | -2.334837922 |
| mmu-mir-30e | chr4  | UGUUUAC | 15463 | 0.796759112  | 0.603173679  | -1.43747591  |
| mmu-mir-32  | chr4  | GUGCAAU | 19397 | 1.340034021  | -0.902219967 | 9.75E-02     |
| mmu-mir-32  | chr4  | UGCAAUA | 19397 | 2.21372418   | 0.341041805  | -1.789623874 |
| mmu-mir-326 | chr7  | CCAGAGG | 20278 | 0.548512167  | -0.181500855 | -0.422447712 |

|             |       |         |       |              |              |              |
|-------------|-------|---------|-------|--------------|--------------|--------------|
| mmu-mir-326 | chr7  | CCCAGAG | 20278 | 2.444824217  | -0.280995662 | -0.998895929 |
| mmu-mir-33  | chr15 | AAUGCAC | 10329 | -1.872933377 | -2.123281709 | 1.179654512  |
| mmu-mir-33  | chr15 | CAAUGCA | 10329 | -0.385578979 | -0.81556442  | -0.167424601 |
| mmu-mir-33  | chr15 | AAUGCAC | 18413 | 4.20E-02     | 0.40205742   | -0.887766329 |
| mmu-mir-33  | chr15 | CAAUGCA | 18413 | -0.21936612  | -0.500289263 | -0.797057156 |
| mmu-mir-335 | chr6  | CUCUUGA | 7136  | 0.844476911  | -9.11E-02    | -0.395344321 |
| mmu-mir-335 | chr6  | GCUCUUG | 7136  | -0.700126374 | 1.017987226  | -1.595928956 |
| mmu-mir-338 | chr11 | AUGCUGG | 1249  | 0.523695749  | -0.980743029 | -0.867325631 |
| mmu-mir-338 | chr11 | UGCUGGA | 1249  | 9.73E-02     | 0.151779084  | -1.202110595 |
| mmu-mir-340 | chr11 | AGACGGA | 11706 | -0.604713987 | 3.882187471  | -0.604713987 |
| mmu-mir-340 | chr11 | GAGACGG | 11706 | -0.361754495 | -0.361754495 | -0.361754495 |
| mmu-mir-342 | chr12 | GUGUGAG | 12968 | -0.535250571 | 0.910325735  | 2.83370329   |
| mmu-mir-342 | chr12 | UGUGAGA | 12968 | 0.50997243   | 1.047791633  | -1.39684111  |
| mmu-mir-342 | chr12 | GUGUGAG | 16466 | -1.063991088 | -8.68E-02    | 3.583932512  |
| mmu-mir-342 | chr12 | UGUGAGA | 16466 | 0.574709927  | -0.527850564 | -0.535507891 |
| mmu-mir-346 | chr14 | GCAGACA | 5468  | -0.490702254 | 0.265579583  | 0.555921033  |
| mmu-mir-346 | chr14 | GGCAGAC | 5468  | -0.761963129 | -0.628602271 | 0.792411736  |
| mmu-mir-361 | chrX  | CUGAUAA | 15214 | 9.44E-02     | -0.326945044 | 0.535843729  |
| mmu-mir-361 | chrX  | UCUGAUA | 15214 | 0.941053439  | 0.020863943  | 0.88014881   |
| mmu-mir-378 | chr18 | GUCAGGA | 16312 | 1.790080738  | -0.444859241 | 2.457448349  |
| mmu-mir-378 | chr18 | UCAGGAG | 16312 | 2.312802445  | -1.324522588 | 0.681753891  |
| mmu-mir-448 | chrX  | AUAUGCA | 16820 | -1.831465059 | 1.808033974  | -2.106369748 |
| mmu-mir-448 | chrX  | UAUGCAA | 16820 | -0.285489458 | -0.249856633 | -0.333237444 |
| mmu-mir-452 | chrX  | GCAAACA | 5524  | -0.027973292 | -0.263660199 | 0.955322624  |
| mmu-mir-452 | chrX  | UGCAAAC | 5524  | -1.319775712 | 0.639263273  | 0.891217238  |
| mmu-mir-483 | chr7  | AGGAGUG | 251   | -0.772159211 | 1.648589539  | -0.788216743 |
| mmu-mir-483 | chr7  | GGAGUGA | 251   | -0.546127669 | -0.776461641 | -1.928131503 |
| mmu-mir-483 | chr7  | AGGAGUG | 14664 | 0.944960784  | -1.197288962 | -0.72160772  |
| mmu-mir-483 | chr7  | GGAGUGA | 14664 | -1.237129586 | -0.350844519 | 0.412358861  |
| mmu-mir-7   | chr13 | GUCUUCC | 7515  | 2.646759526  | -1.323290917 | -1.323290917 |
| mmu-mir-7   | chr13 | UCUUGCA | 7515  | 3.101139208  | -0.441076352 | -5.21E-02    |
| mmu-mir-7   | chr13 | GUCUUCC | 14688 | 3.533916709  | -0.326328768 | -1.8177193   |
| mmu-mir-7   | chr13 | UCUUGCA | 14688 | 3.133106444  | -0.505821372 | -2.590706934 |
| mmu-mir-7   | chr13 | GUCUUCC | 20300 | 3.749178046  | -0.105328654 | -0.98092673  |
| mmu-mir-7   | chr13 | UCUUGCA | 20300 | 3.335188628  | -0.511096892 | -1.573263311 |
| mmu-mir-93  | chr5  | CACUUUG | 350   | 0.928715533  | -0.937262893 | 0.525684689  |
| mmu-mir-93  | chr5  | GCACUUU | 350   | 1.12391263   | -0.19098518  | 1.918767402  |
| mmu-mir-93  | chr5  | CACUUUG | 351   | 0.801153063  | -0.354174517 | 0.21054887   |
| mmu-mir-93  | chr5  | GCACUUU | 351   | 0.676813758  | 0.479737282  | 1.258476368  |
| mmu-mir-93  | chr5  | CACUUUG | 14088 | 1.314567733  | -1.461354902 | 8.78E-02     |
| mmu-mir-93  | chr5  | GCACUUU | 14088 | 0.937770196  | -0.567473014 | 1.302317357  |
| mmu-mir-93  | chr5  | CACUUUG | 14408 | 0.451790773  | 4.75E-02     | 1.558317239  |
| mmu-mir-93  | chr5  | GCACUUU | 14408 | 0.70667383   | -1.885180435 | 1.732990603  |

**Table S6** NCELL CE analysis result

| miRNA        | chr   | seed match | probe | CE score     |              |              |
|--------------|-------|------------|-------|--------------|--------------|--------------|
|              |       |            |       | top 10% set  | mid 10% set  | bot. 10% set |
| mmu-mir-101b | chr19 | GUACUGU    | 1046  | 0.106119653  | 0.729092524  | -0.991032873 |
| mmu-mir-101b | chr19 | UACUGUA    | 1046  | -0.681207892 | 2.839489695  | -1.359507427 |
| mmu-mir-103  | chr11 | AUGCUGC    | 9867  | 0.755620731  | -1.298341785 | -1.289859834 |
| mmu-mir-103  | chr11 | UGCUGCU    | 9867  | 1.320072049  | -0.768834782 | -1.757576914 |
| mmu-mir-103  | chr11 | AUGCUGC    | 12510 | 2.845365616  | -0.719268963 | 1.342372128  |
| mmu-mir-103  | chr11 | UGCUGCU    | 12510 | 1.446110158  | 0.722674328  | -1.420752671 |
| mmu-mir-106b | chr5  | CACUUUA    | 350   | 1.478846194  | -0.138501496 | -2.155844729 |
| mmu-mir-106b | chr5  | GCACUUU    | 350   | 3.064747706  | -0.521932412 | -3.872566107 |
| mmu-mir-106b | chr5  | CACUUUA    | 14088 | -0.142695308 | 1.253172966  | -2.289009483 |
| mmu-mir-106b | chr5  | GCACUUU    | 14088 | -0.379973144 | -0.301269495 | -2.963304688 |
| mmu-mir-106b | chr5  | CACUUUA    | 14408 | 0.218241823  | 0.676932759  | -0.145916641 |
| mmu-mir-106b | chr5  | GCACUUU    | 14408 | -0.643438409 | 1.28550566   | -1.140135219 |
| mmu-mir-107  | chr19 | AUGCUGC    | 2995  | -6.63E-02    | 1.007443828  | 1.17730495   |
| mmu-mir-107  | chr19 | UGCUGCU    | 2995  | 0.284224532  | -1.01977143  | 0.196003694  |
| mmu-mir-107  | chr19 | AUGCUGC    | 12000 | -9.03E-02    | 0.222980852  | 0.480354643  |
| mmu-mir-107  | chr19 | UGCUGCU    | 12000 | -0.273897121 | 1.054291865  | 1.216334692  |
| mmu-mir-10b  | chr2  | CUACAGG    | 16564 | -1.133260671 | -1.050699091 | -0.672291847 |
| mmu-mir-10b  | chr2  | UACAGGG    | 16564 | -0.921032333 | 0.370372813  | -1.730271943 |
| mmu-mir-128a | chr1  | ACUGUGA    | 12602 | 2.390187654  | -2.718985914 | 1.399887305  |
| mmu-mir-128a | chr1  | CACUGUG    | 12602 | 1.219386075  | -1.278724998 | 0.925572611  |
| mmu-mir-128b | chr9  | ACUGUGA    | 3304  | 0.986544551  | -1.250897748 | 1.26126626   |
| mmu-mir-128b | chr9  | CACUGUG    | 3304  | 0.581308026  | -0.969542939 | 0.95271655   |
| mmu-mir-128b | chr9  | ACUGUGA    | 17596 | 2.045735359  | 0.199369747  | 0.34703312   |
| mmu-mir-128b | chr9  | CACUGUG    | 17596 | 1.423248595  | -1.223581324 | 1.409099079  |
| mmu-mir-139  | chr7  | ACUGUAG    | 18435 | 0.323607405  | 0.829083679  | 0.59958038   |
| mmu-mir-139  | chr7  | CUGUAGA    | 18435 | 1.887456199  | -0.238877615 | 6.42E-02     |
| mmu-mir-140  | chr8  | AACCACU    | 14657 | 0.22220851   | -1.096117256 | -1.536252031 |
| mmu-mir-140  | chr8  | ACCACUG    | 14657 | -0.297901057 | 0.700278783  | -0.9362181   |
| mmu-mir-140  | chr8  | AACCACU    | 19938 | -0.340685934 | -0.162808209 | -0.162808209 |
| mmu-mir-140  | chr8  | ACCACUG    | 19938 | -1.72566609  | -0.49547538  | -0.69476774  |
| mmu-mir-148b | chr15 | GCACUGA    | 18093 | 1.699866987  | -0.66287414  | -1.205915348 |
| mmu-mir-148b | chr15 | UGCACUG    | 18093 | 0.442035822  | 0.551193148  | -3.393388761 |
| mmu-mir-149  | chr1  | AGCCAGA    | 1696  | 1.667739993  | 0.574988838  | 0.841095542  |
| mmu-mir-149  | chr1  | GAGCCAG    | 1696  | 1.505519059  | -0.41814038  | 0.131526459  |
| mmu-mir-152  | chr11 | GCACUGA    | 2744  | -0.558067405 | -1.250358003 | 0.123918773  |
| mmu-mir-152  | chr11 | UGCACUG    | 2744  | -0.251113199 | -0.525825803 | 0.113083744  |
| mmu-mir-153  | chr12 | CUAUGCA    | 9390  | 0.193085325  | 0.493545299  | 0.500354984  |
| mmu-mir-153  | chr12 | UAUGCAA    | 9390  | 2.101909834  | 1.724952051  | -0.285489458 |
| mmu-mir-186  | chr3  | AUUCUUU    | 19231 | 2.853181435  | -0.48004908  | -0.198065029 |
| mmu-mir-186  | chr3  | UUCUUUG    | 19231 | 2.710691015  | -0.850820124 | -3.202181112 |
| mmu-mir-208  | chr14 | CGUCUUA    | 15058 | 1.398175254  | 1.291037849  | -0.744572843 |
| mmu-mir-208  | chr14 | GUCUUAU    | 15058 | 1.787607439  | 0.1618833    | -0.804450541 |
| mmu-mir-208  | chr14 | CGUCUUA    | 15059 | 1.291037849  | -0.744572843 | -0.744572843 |
| mmu-mir-208  | chr14 | GUCUUAU    | 15059 | 2.261328381  | 0.557461124  | -1.228030748 |
| mmu-mir-218  | chr5  | AAGCACA    | 8429  | -2.011712852 | -0.293819588 | 1.538811078  |
| mmu-mir-218  | chr5  | AGCACA     | 8429  | -0.36569966  | 7.93E-02     | 0.789253675  |
| mmu-mir-218  | chr5  | AAGCACA    | 17740 | 1.011061495  | -8.77E-02    | 0.167983895  |



|             |       |         |       |              |              |              |
|-------------|-------|---------|-------|--------------|--------------|--------------|
| mmu-mir-218 | chr5  | AGCACAA | 17740 | 0.128271207  | -1.764214582 | 1.53783454   |
| mmu-mir-224 | chrX  | GUGACUU | 5524  | 0.110068351  | 0.27253114   | -1.500053939 |
| mmu-mir-224 | chrX  | UGACUUA | 5524  | 0.487757865  | 0.777161073  | -1.503191272 |
| mmu-mir-25  | chr5  | GUGCAAU | 350   | 1.331124403  | -0.131788671 | -0.057369301 |
| mmu-mir-25  | chr5  | UGCAAUG | 350   | 3.026947923  | -0.93277354  | -0.978409568 |
| mmu-mir-25  | chr5  | GUGCAAU | 14088 | -0.057369301 | 1.091837506  | -0.861165843 |
| mmu-mir-25  | chr5  | UGCAAUG | 14088 | -2.618195052 | -0.120932609 | -2.225251065 |
| mmu-mir-25  | chr5  | GUGCAAU | 14408 | -1.600140083 | 2.462379993  | -1.166948287 |
| mmu-mir-25  | chr5  | UGCAAUG | 14408 | -2.476896701 | 1.016536827  | 5.60E-02     |
| mmu-mir-26a | chr9  | ACUUGAA | 6363  | -0.181659292 | 0.45886344   | 0.463237727  |
| mmu-mir-26a | chr9  | UACUUGA | 6363  | -0.341509553 | 1.271374748  | 3.423217912  |
| mmu-mir-26b | chr1  | ACUUGAA | 18303 | 0.160293674  | 0.47986946   | -1.318707465 |
| mmu-mir-26b | chr1  | UACUUGA | 18303 | -0.929942465 | 1.460851422  | 2.022812043  |
| mmu-mir-30c | chr4  | GUUUACA | 15463 | 2.107439019  | -4.06E-02    | -0.19323822  |
| mmu-mir-30c | chr4  | UGUUUAC | 15463 | 1.599676545  | -1.483466909 | -0.210634926 |
| mmu-mir-30e | chr4  | GUUUACA | 15463 | 2.107439019  | -4.06E-02    | -0.19323822  |
| mmu-mir-30e | chr4  | UGUUUAC | 15463 | 1.599676545  | -1.483466909 | -0.210634926 |
| mmu-mir-32  | chr4  | GUGCAAU | 19397 | -0.325677263 | -0.300564695 | 0.834464972  |
| mmu-mir-32  | chr4  | UGCAAUA | 19397 | 3.080759454  | -1.077089308 | -0.548916832 |
| mmu-mir-326 | chr7  | CCAGAGG | 20278 | 0.935384282  | 0.633181148  | 2.653191013  |
| mmu-mir-326 | chr7  | CCCAGAG | 20278 | 0.369708533  | -0.468805403 | -0.245883406 |
| mmu-mir-33  | chr15 | AAUGCAC | 10329 | -1.394125091 | -1.736334584 | 0.356800446  |
| mmu-mir-33  | chr15 | CAAUGCA | 10329 | -0.332693069 | -2.218624572 | -0.416197138 |
| mmu-mir-33  | chr15 | AAUGCAC | 18413 | 0.300229229  | 2.268400974  | -0.805835601 |
| mmu-mir-33  | chr15 | CAAUGCA | 18413 | -0.269229978 | 0.752245817  | -0.416197138 |
| mmu-mir-335 | chr6  | CUCUUGA | 7136  | -1.039027321 | -0.111763699 | 1.201094697  |
| mmu-mir-335 | chr6  | GCUCUUG | 7136  | 0.33349199   | -1.785947685 | 0.538749537  |
| mmu-mir-338 | chr11 | AUGCUGG | 1249  | -2.027954634 | -0.188610694 | 1.387795522  |
| mmu-mir-338 | chr11 | UGCUGGA | 1249  | -0.633123666 | -0.480919662 | 0.743960177  |
| mmu-mir-340 | chr11 | AGACGGA | 11706 | -0.604713987 | 0.770304202  | -0.604713987 |
| mmu-mir-340 | chr11 | GAGACGG | 11706 | -0.361754495 | -0.361754495 | 2.231412877  |
| mmu-mir-342 | chr12 | GUGUGAG | 12968 | 0.304710294  | -0.34648277  | 3.260978808  |
| mmu-mir-342 | chr12 | UGUGAGA | 12968 | 1.047791633  | 0.1784718    | 0.397203887  |
| mmu-mir-342 | chr12 | GUGUGAG | 16466 | -0.61446563  | -0.886304359 | 1.089834606  |
| mmu-mir-342 | chr12 | UGUGAGA | 16466 | -9.05E-02    | 1.019780217  | -1.312319233 |
| mmu-mir-346 | chr14 | GCAGACA | 5468  | -0.168517672 | 0.105451874  | -0.448503442 |
| mmu-mir-346 | chr14 | GGCAGAC | 5468  | -2.04E-02    | -0.68202385  | 2.062936018  |
| mmu-mir-361 | chrX  | CUGAUAA | 15214 | 1.498662651  | -0.432446997 | -0.64644488  |
| mmu-mir-361 | chrX  | UCUGAUA | 15214 | 1.179596567  | -1.098225132 | -0.369720087 |
| mmu-mir-378 | chr18 | GUCAGGA | 16312 | -0.582025228 | 1.267737242  | 0.275262191  |
| mmu-mir-378 | chr18 | UCAGGAG | 16312 | -1.335520069 | 0.172051218  | 1.474063987  |
| mmu-mir-448 | chrX  | AUAUGCA | 16820 | -0.623163055 | -0.858952773 | 0.148645526  |
| mmu-mir-448 | chrX  | UAUGCAA | 16820 | -0.913752429 | 0.826449938  | 0.826449938  |
| mmu-mir-452 | chrX  | GCAAACA | 5524  | -1.832425903 | -0.590989502 | 0.709498645  |
| mmu-mir-452 | chrX  | UGCAAAC | 5524  | -0.579346746 | -1.217777078 | 1.136387827  |
| mmu-mir-7   | chr13 | GUCUUCC | 7515  | 2.157684666  | -1.192987018 | -1.090284438 |
| mmu-mir-7   | chr13 | UCUUCCA | 7515  | 2.485215586  | -1.654012805 | -0.168774251 |
| mmu-mir-7   | chr13 | GUCUUCC | 14688 | 2.190446789  | -1.557540097 | -1.486508016 |
| mmu-mir-7   | chr13 | UCUUCCA | 14688 | 2.666085117  | -1.641428468 | -0.285842135 |
| mmu-mir-7   | chr13 | GUCUUCC | 20300 | 4.614843901  | -1.826253123 | -0.721165263 |

|            |       |         |       |              |              |              |
|------------|-------|---------|-------|--------------|--------------|--------------|
| mmu-mir-7  | chr13 | UCUUCCA | 20300 | 3.009935984  | -1.934229592 | -1.350298291 |
| mmu-mir-93 | chr5  | CACUUUG | 350   | 3.320035868  | -0.66819524  | -2.372439361 |
| mmu-mir-93 | chr5  | GCACUUU | 350   | 3.064747706  | -0.521932412 | -3.872566107 |
| mmu-mir-93 | chr5  | CACUUUG | 14088 | -1.057775537 | -0.692706662 | -6.96E-02    |
| mmu-mir-93 | chr5  | GCACUUU | 14088 | -0.379973144 | -0.301269495 | -2.963304688 |
| mmu-mir-93 | chr5  | CACUUUG | 14408 | -0.730599995 | -0.460179393 | 0.819811454  |
| mmu-mir-93 | chr5  | GCACUUU | 14408 | -0.643438409 | 1.28550566   | -1.140135219 |

## **Linked Excel Tables**

**Table S7** Mappings between probe IDs and RefSeq genes in human atlas

**Table S8** Mappings between probe IDs and RefSeq genes in mouse atlas

**Table S9** Mappings between probe IDs and RefSeq genes in MDEV/NCELL

**Table S10 & S11** Predicted targets in the top-10 or bottom-10 percentile sets of biased embedded miRNAs in human. If a miRNA is Type-I (-II) biased, predicted targets in its top-10 (bottom-10) percentile set is reported.

## **References**

Enright, A. J., John, B., Gaul, U., Tuschl, T., Sander, C., and Marks, D. S. (2003). MicroRNA targets in Drosophila. *Genome Biol* 5, R1.
